# Supplementary material for: Uneven vulnerability: characterizing population composition and change in the low elevation coastal zone in the United States with a climate justice lens, 1990–2020
Source: Frontiers journal article supplement (doi:10.3389/fenvs.2023.1111856), 2023-08-11
Supplement: Data_Sheet_1.pdf [file Data_Sheet_1.pdf]

## *Supplementary Materials*

These materials are supplemental to the following paper:

Tagtachian, D., and D. Balk (2023), Uneven vulnerability: characterizing population composition and change in the low elevation coastal zone in the United States with a climate justice lens, 1990–2020. *Front. Environ. Sci.* 11:1111856. doi: 10.3389/fenvs.2023.1111856

|                                                                                                                                                                                                                                                                                  |                           |
|----------------------------------------------------------------------------------------------------------------------------------------------------------------------------------------------------------------------------------------------------------------------------------|---------------------------|
| <b><u>Figures</u></b>                                                                                                                                                                                                                                                            |                           |
| Figure S1. Percent of Population identified as Hispanic, Black and White, Florida, overlaid by urban areas and the Low Elevation Coastal Zone (LECZ), 2020.                                                                                                                      | <a href="#"><u>2</u></a>  |
| Figure S2.A-H. State-specific estimates for changes in the population by race and Hispanic origin, by rural/urban classification, within and outside the LECZ, from 1990 to 2020.                                                                                                | <a href="#"><u>2</u></a>  |
| Figure S3.A-C. Annual growth rates for total, occupied, and vacant housing units within and outside the LECZ by urban/rural classification, 1990-2020                                                                                                                            | <a href="#"><u>11</u></a> |
| Figure S4.A-L. Housing Units, 2010, for Florida (A-D), New York (E-H), and Louisiana (I-L), by race and Hispanic origin, and housing tenure, comparisons organized by within vs. outside LECZ by Race and Hispanic Origin, Housing Tenure, and by urban vs. rural classification | <a href="#"><u>12</u></a> |
| Figure S5.A-B. Annual Growth Rates (1990-2010) for housing units by housing tenure and race or Hispanic origin of householder for Florida, New York, and Louisiana                                                                                                               | <a href="#"><u>18</u></a> |
| Figure S6.A-D. Average median age, by urban and rural, in 2000 and 2010 in and outside the LECZ (for all LECZ states, Florida, Louisiana and New York)                                                                                                                           | <a href="#"><u>20</u></a> |
| <b><u>Tables</u></b>                                                                                                                                                                                                                                                             |                           |
| Table S1. Urban and Rural population totals (000s) and percentages in the 0-10m LECZ and outside of all coastal states, 1990 and 2020                                                                                                                                            | <a href="#"><u>21</u></a> |
| Table S2. Urban and Rural population totals (000s) and percentages in the 0-10m LECZ of all coastal states, Florida, New York, Louisiana, 1990-2020                                                                                                                              | <a href="#"><u>22</u></a> |
| Table S3. Total housing units within and outside the LECZ by urban/rural classification, 1990-2020                                                                                                                                                                               | <a href="#"><u>22</u></a> |
| Table S4. Average median age, by urban and rural, in 2000 and 2010 in and outside the LECZ (for all LECZ states, Florida, Louisiana and New York)                                                                                                                                | <a href="#"><u>22</u></a> |
| Table S5.A-C. Distribution of housing units by race and Hispanic origin of householder, 2010                                                                                                                                                                                     | <a href="#"><u>23</u></a> |

## Figures

**Figure S1. Percent of Population identified as Hispanic, Black and White, Florida, overlaid by urban areas and the Low Elevation Coastal Zone (LECZ), 2020.**

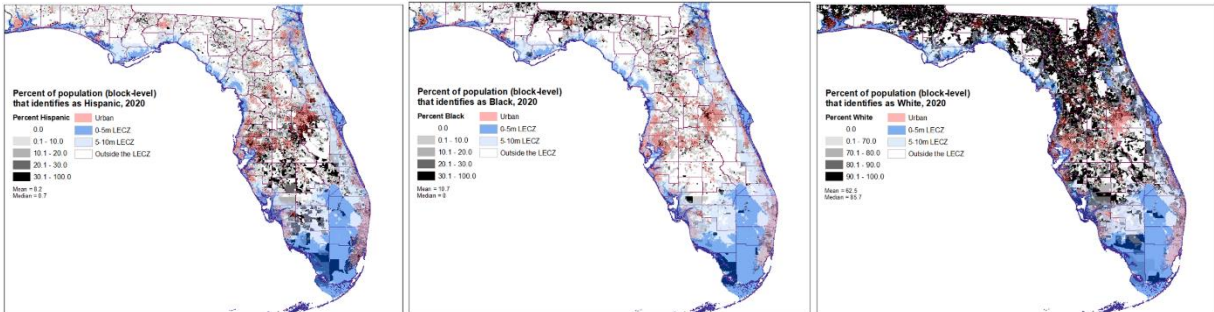

Note: Classification shown in legend is not normalized across all three panels.

**Figure S2.A-H. State-specific estimates for changes in the population by race and Hispanic origin, by rural/urban classification, within and outside the LECZ, from 1990 to 2020.**

Note: The colors associated with each state are consistent across all graphs in Figure S2 but the y axis is not consistent across all graphs. Additionally, the panels are consistent: urban population within the LECZ by state (upper left panel), urban population outside the LECZ by state (upper right panel), rural population within the LECZ (bottom left panel), and the rural population outside the LECZ (bottom right panel).

Figure S2.A. Total Population

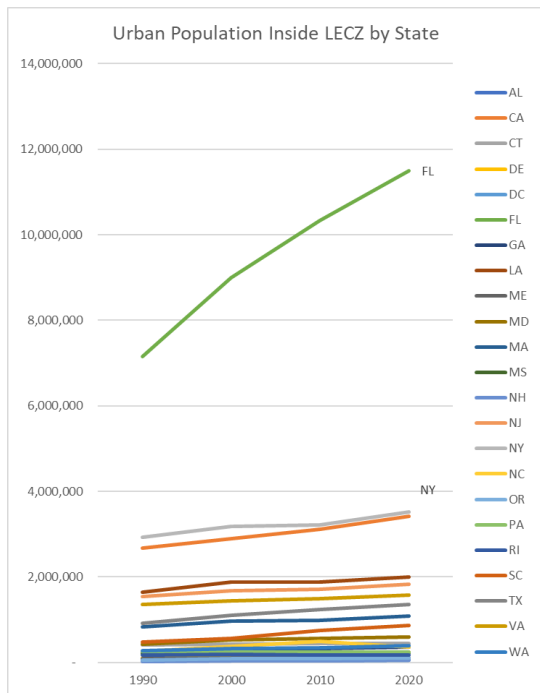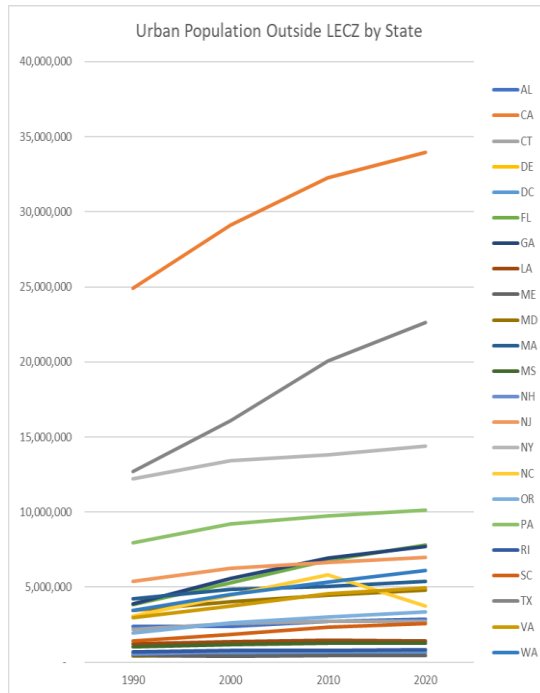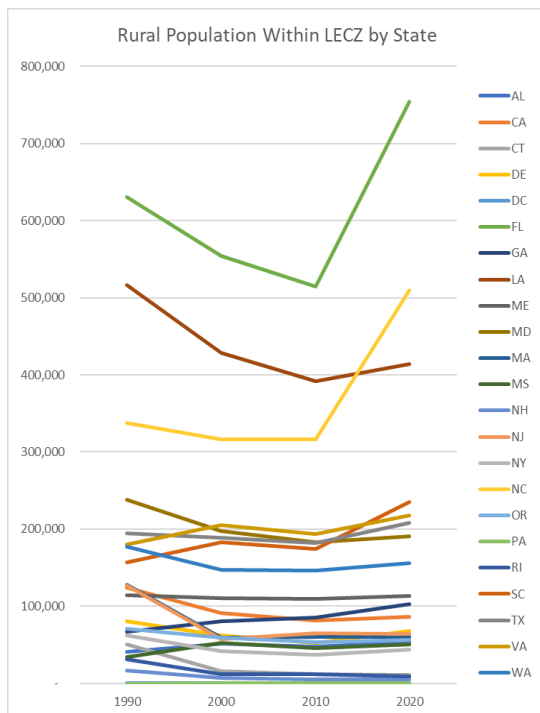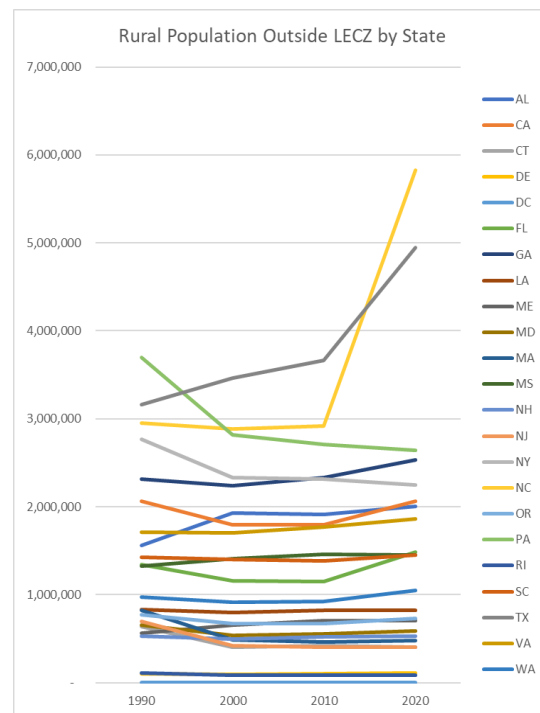

Figure S2.B. Annual Growth Rate for Total Population

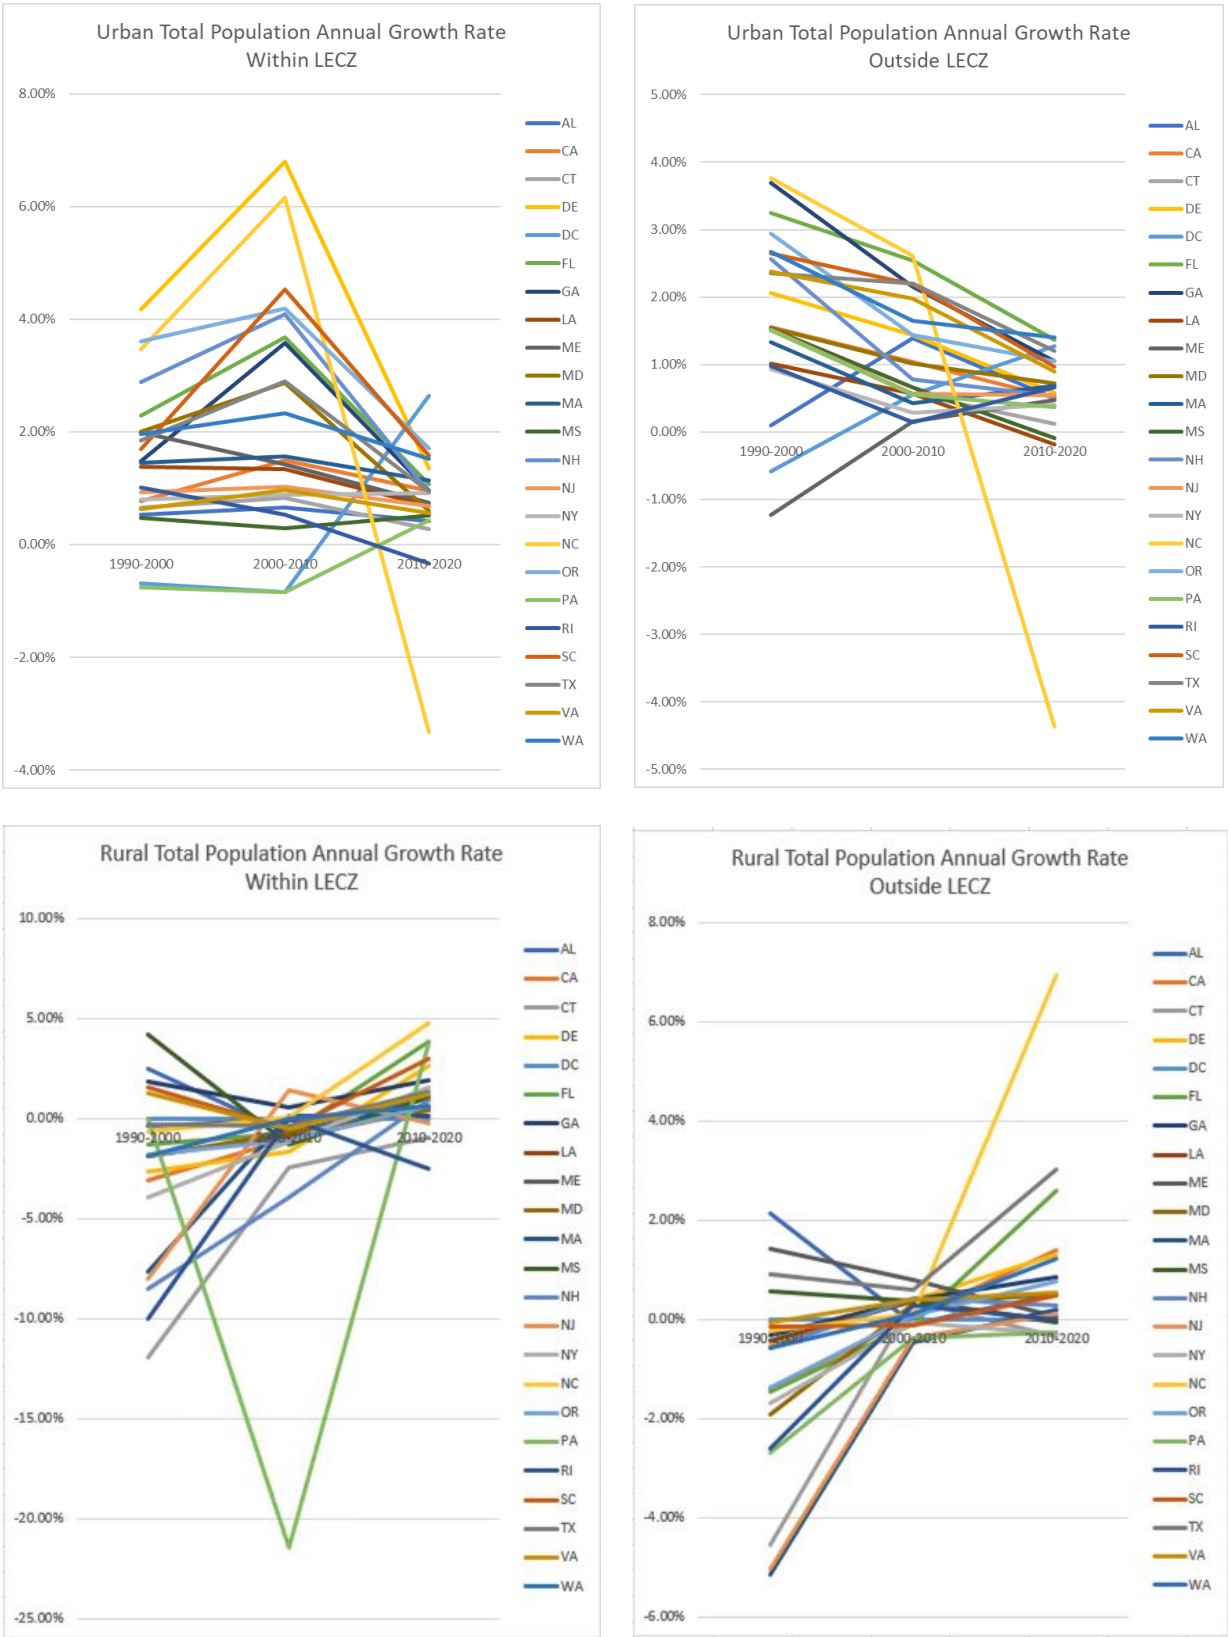

Figure S2.C. White Population, single race

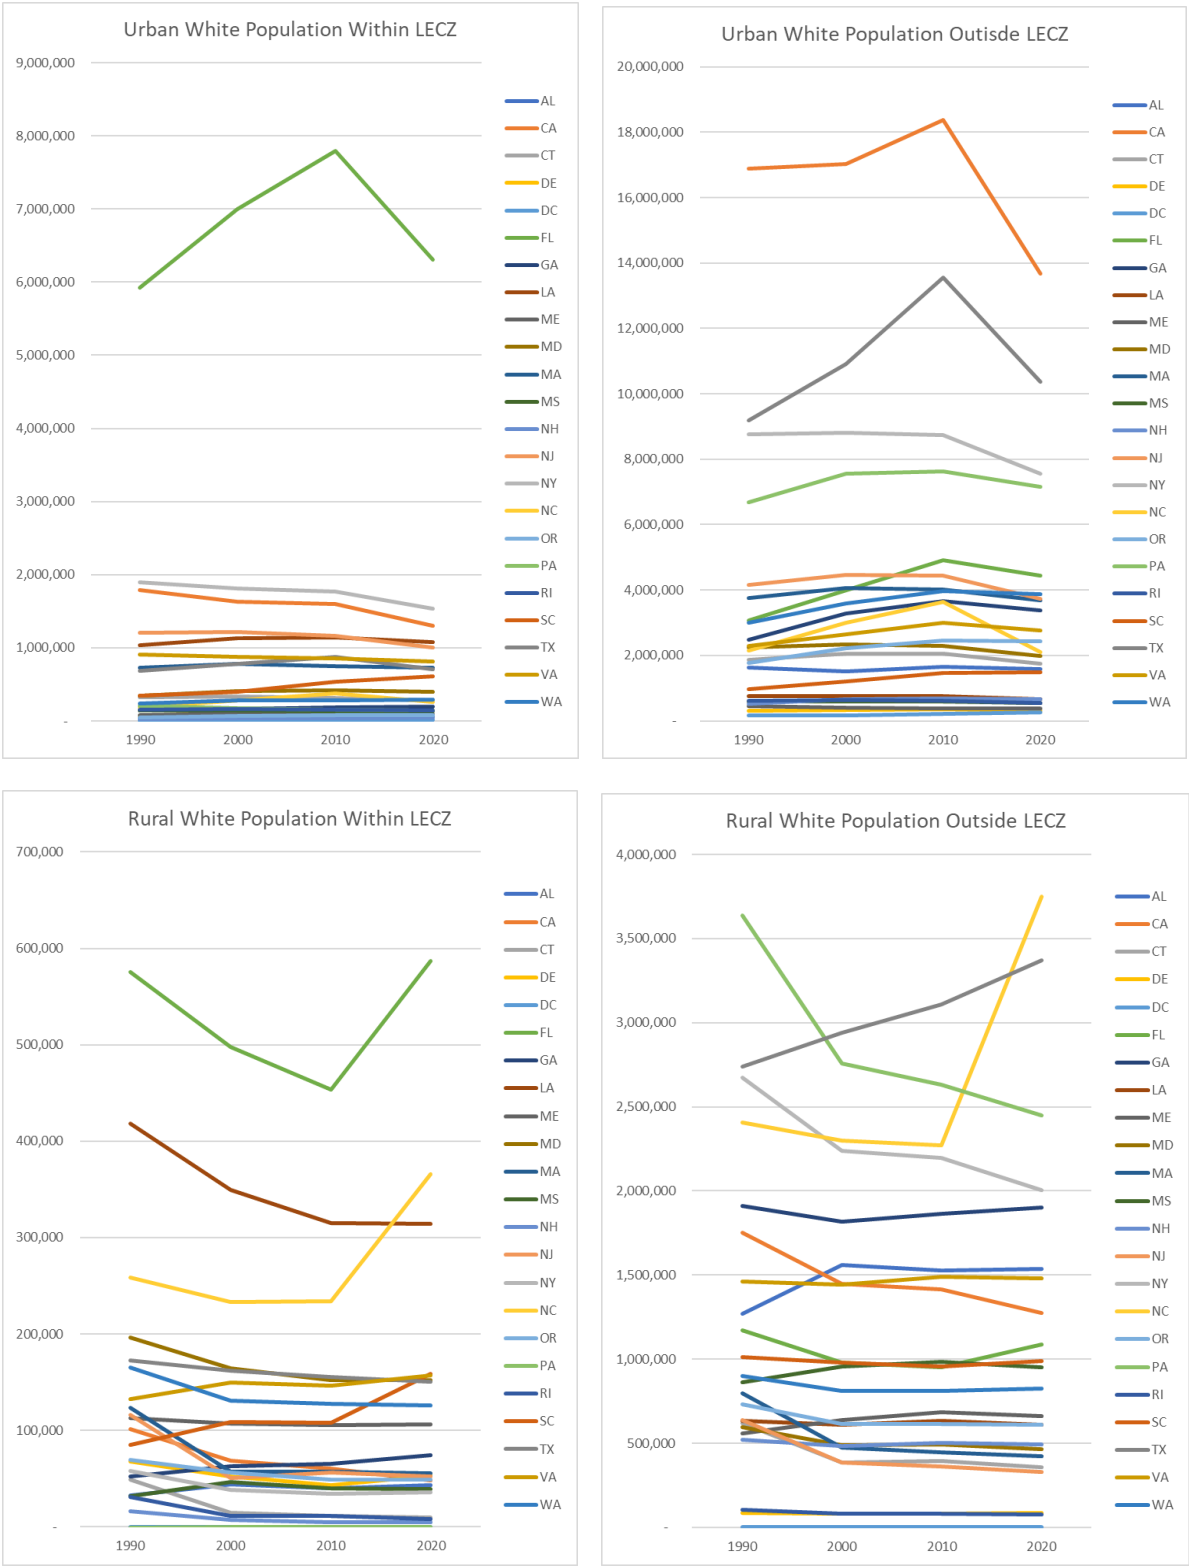

Figure S2.D. Black Population, single race

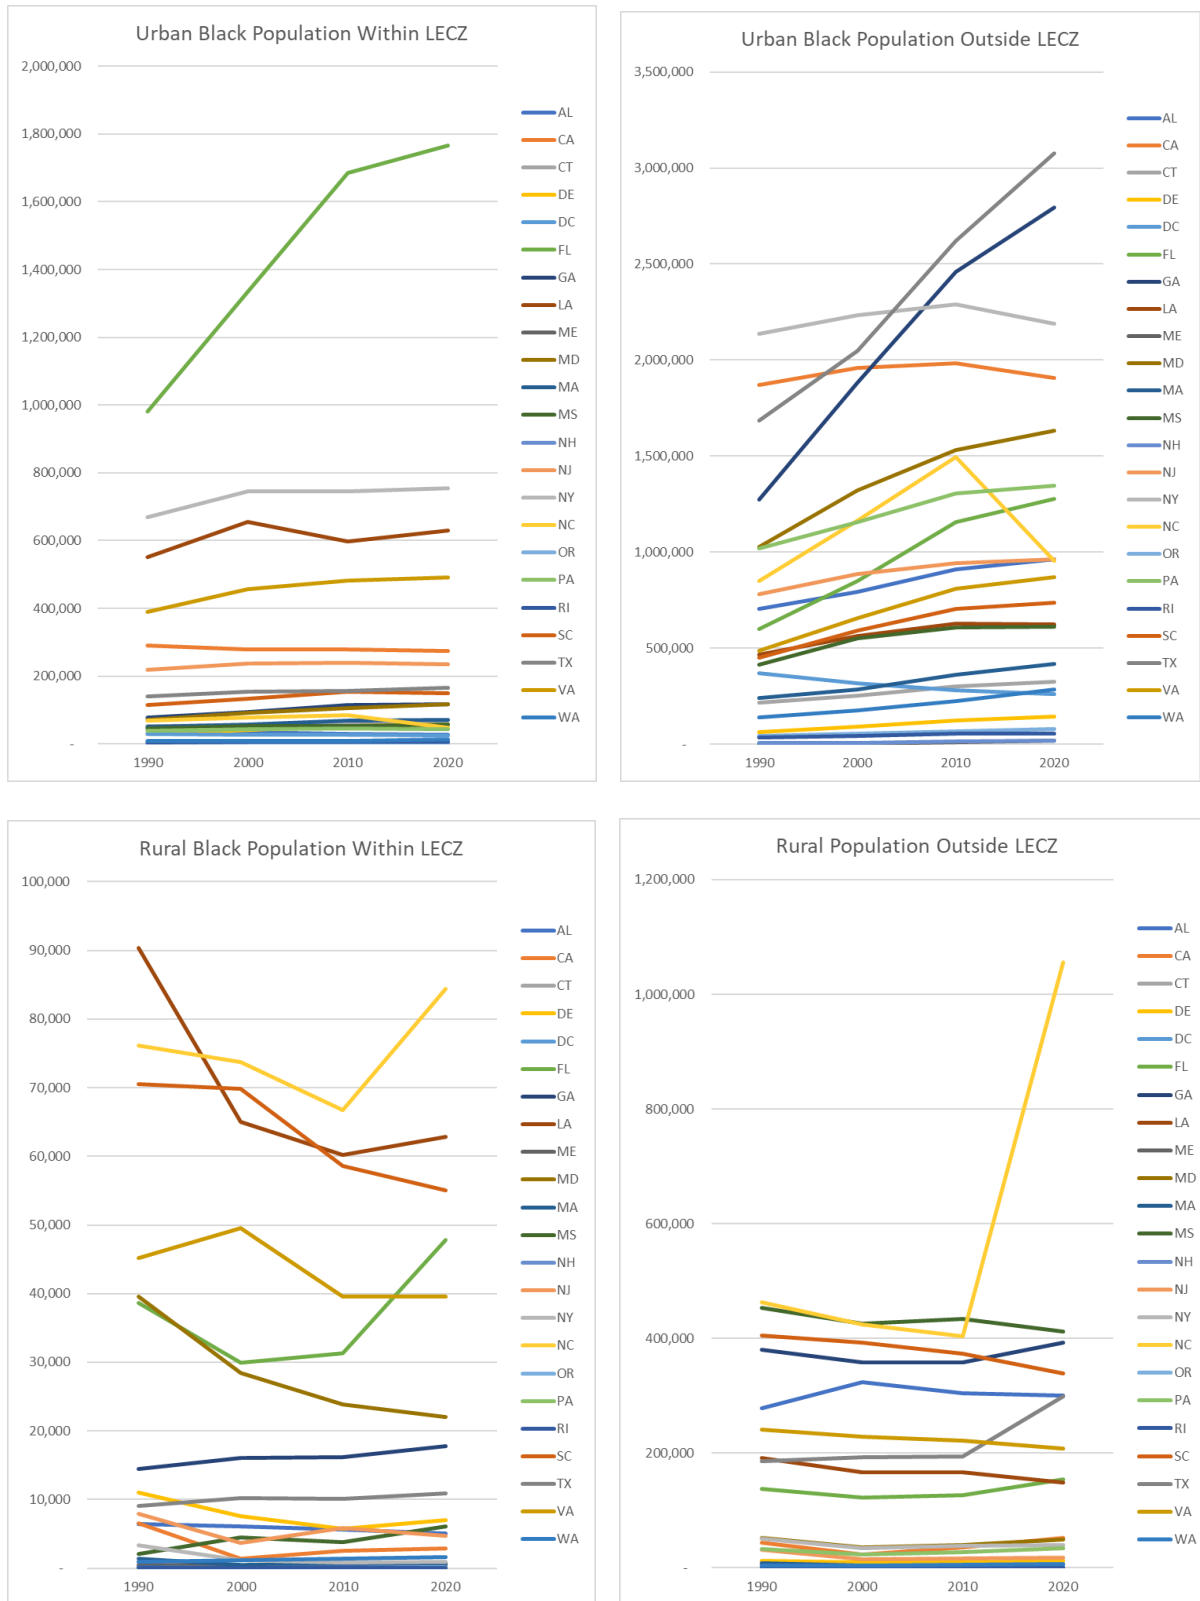

Figure S2.E. Asian Population, single race

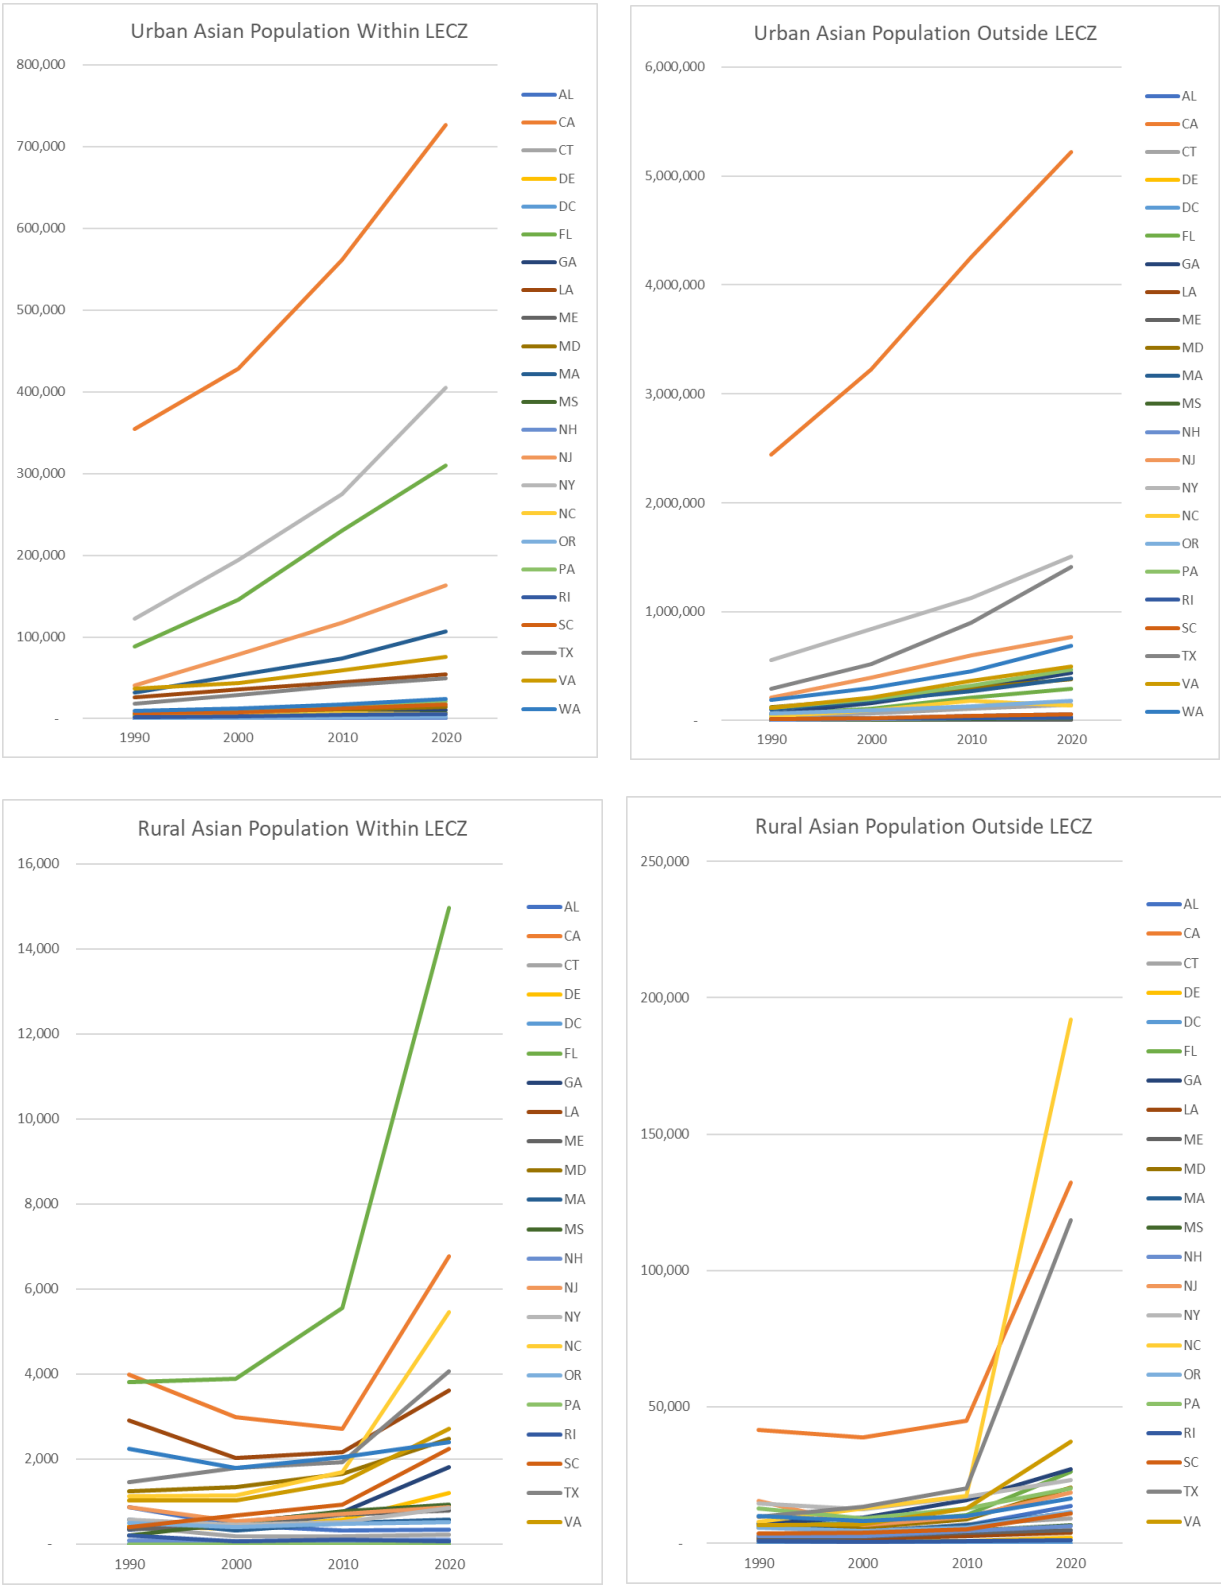

Figure S2.F. Hispanic Population, any race

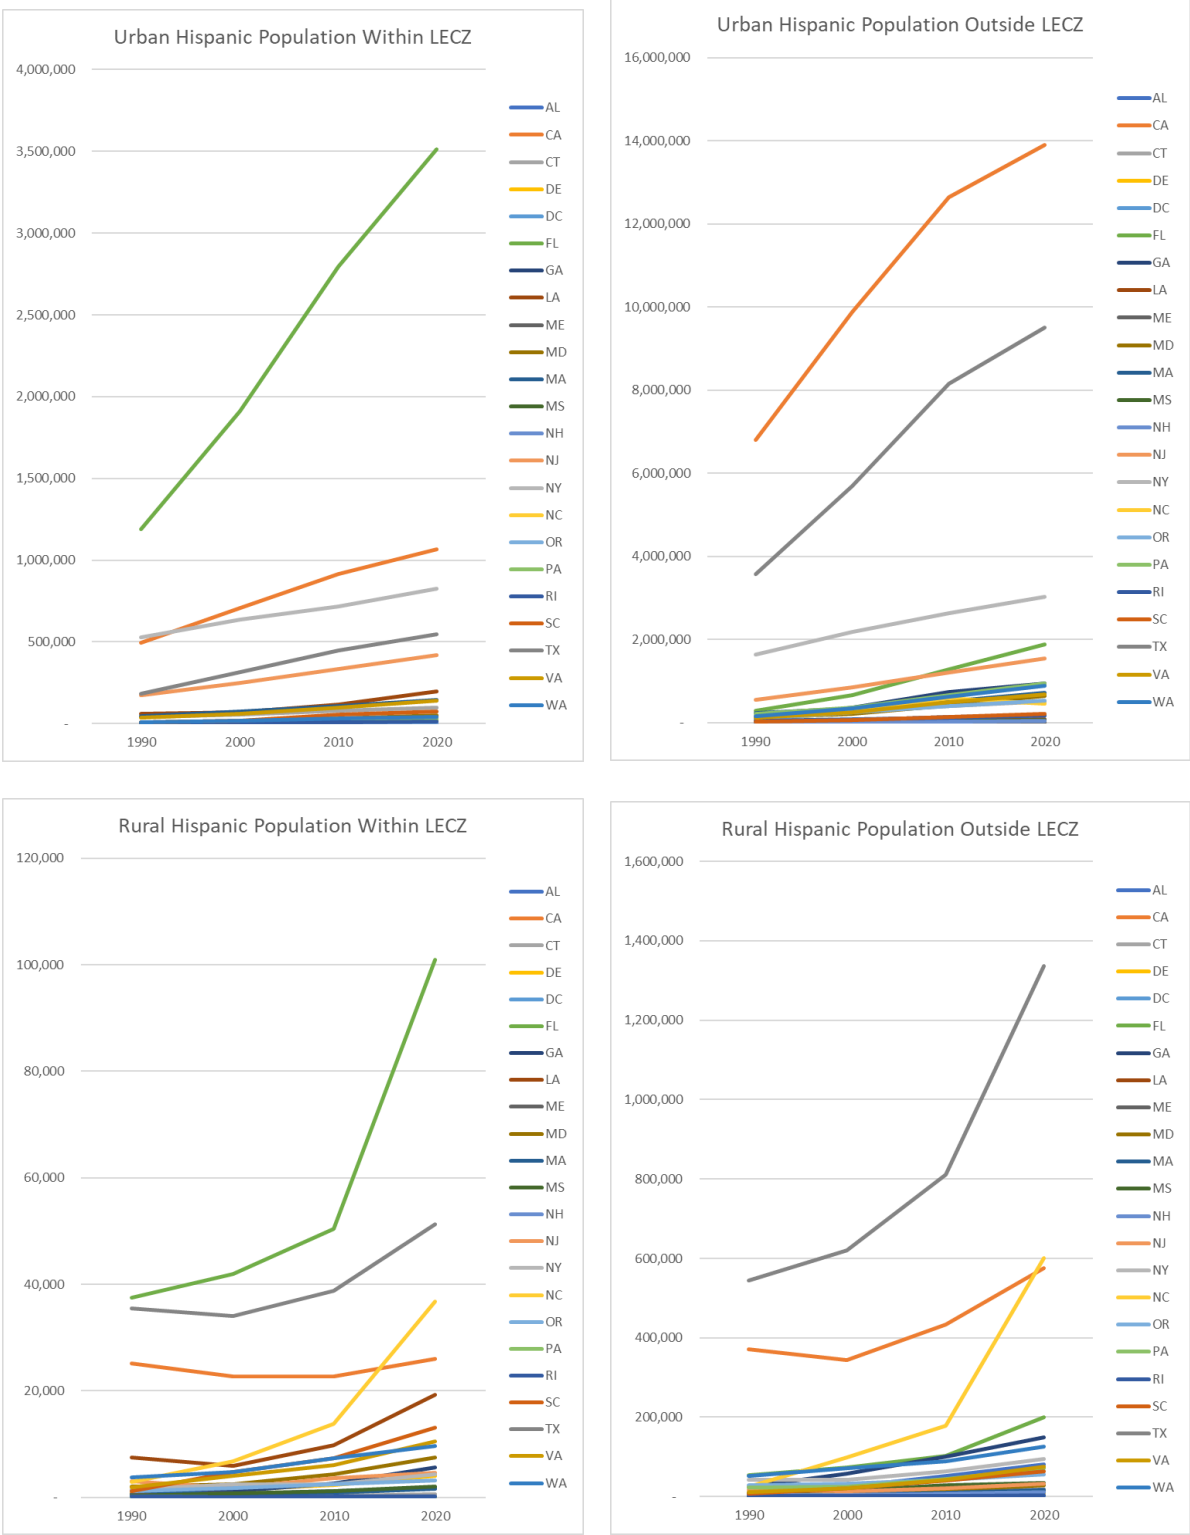



Figure S2.G. Other, single race

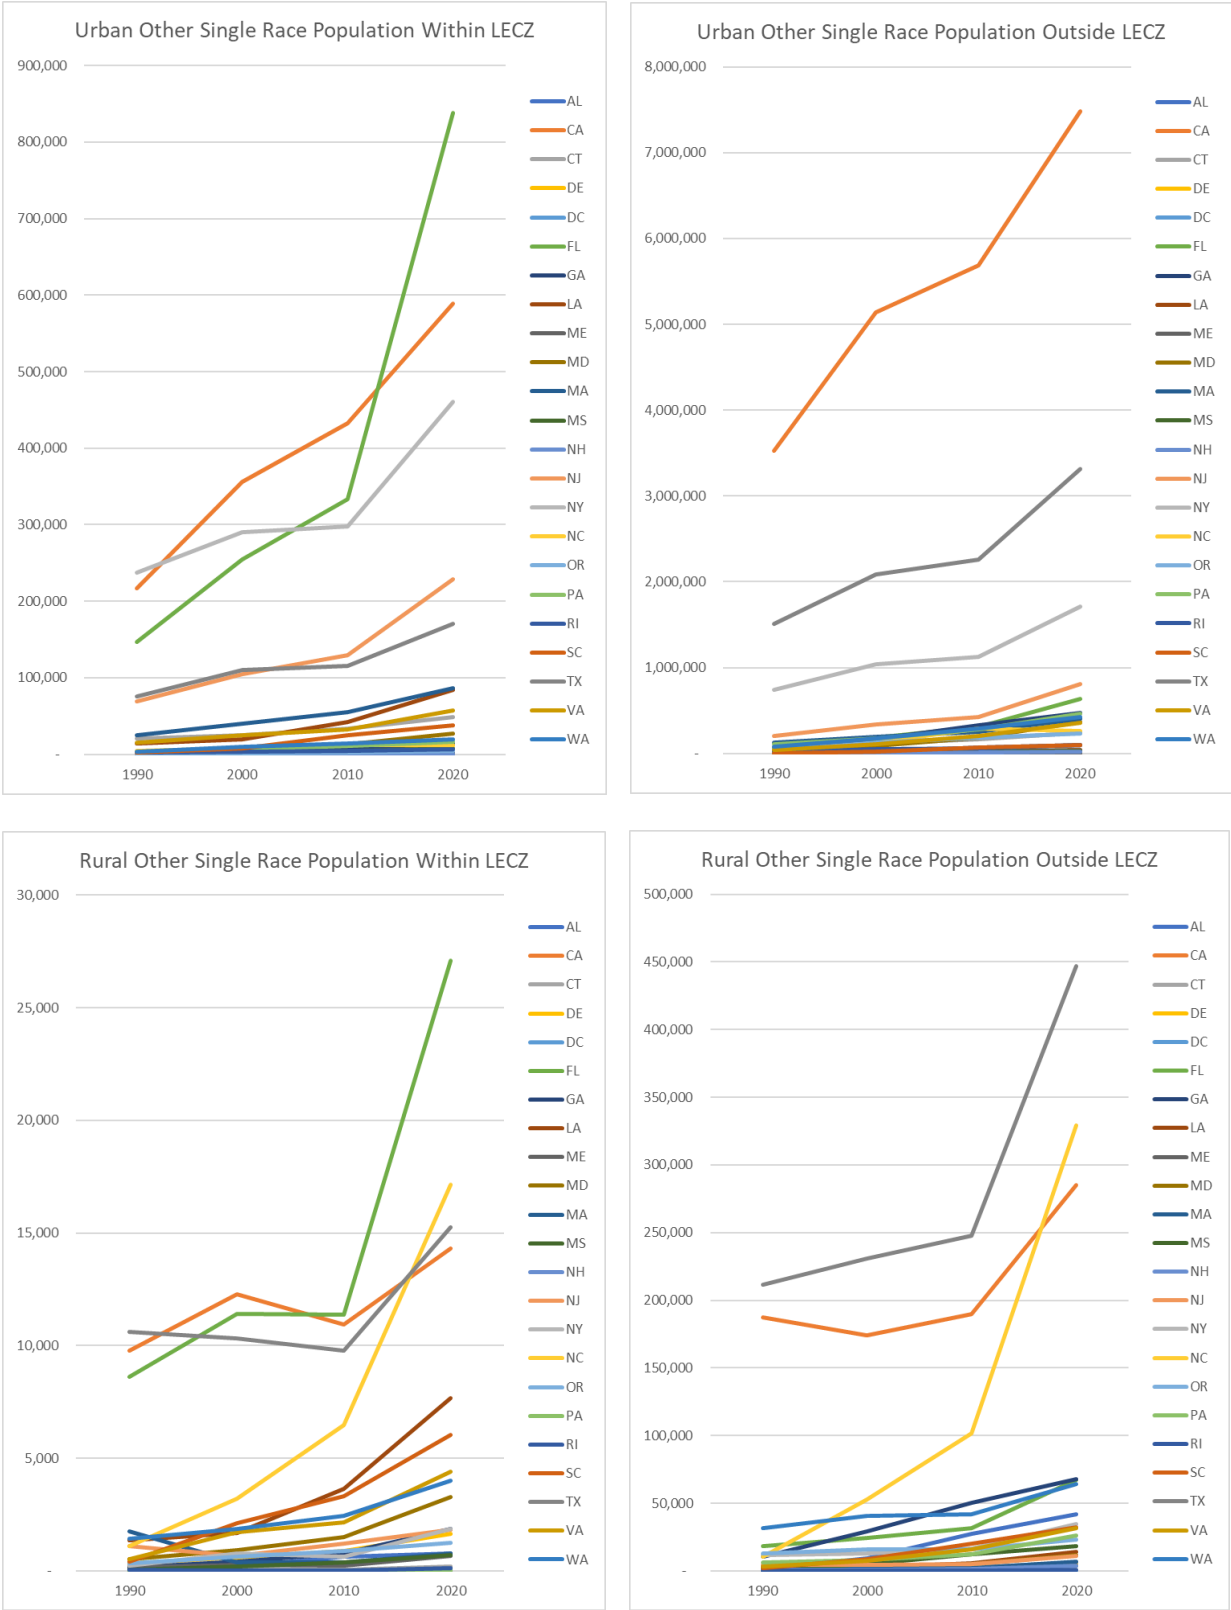

Figure S2.H. Two or More Races (NB: variable introduced in 2000 Census)

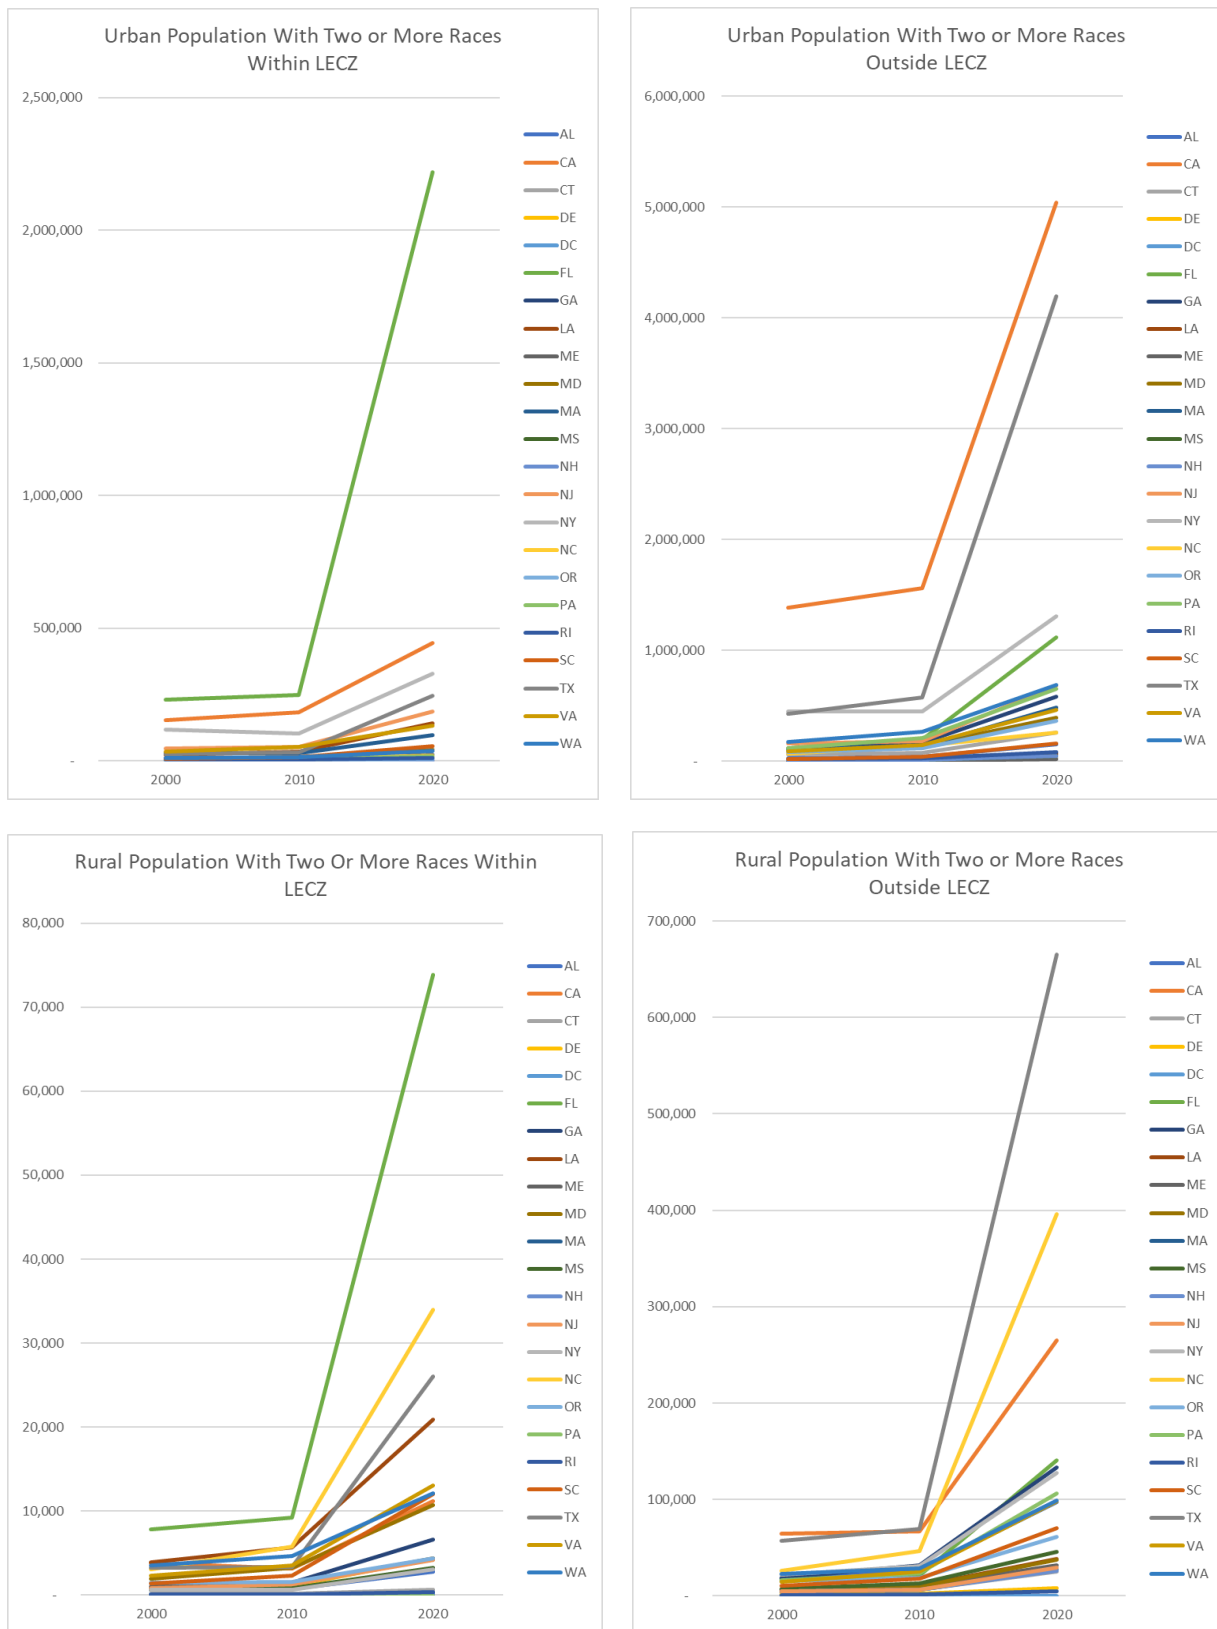

**Figure S3.A-C. Annual growth rates for total, occupied, and vacant housing units within and outside the LECZ by urban/rural classification, 1990-2020**

**Figure S3.A. Total Housing Units**

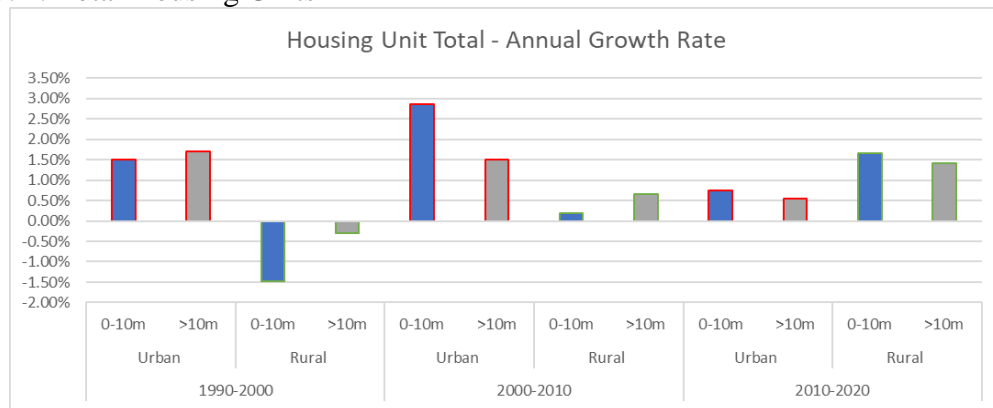

**Figure S3.B. Occupied Housing Units**

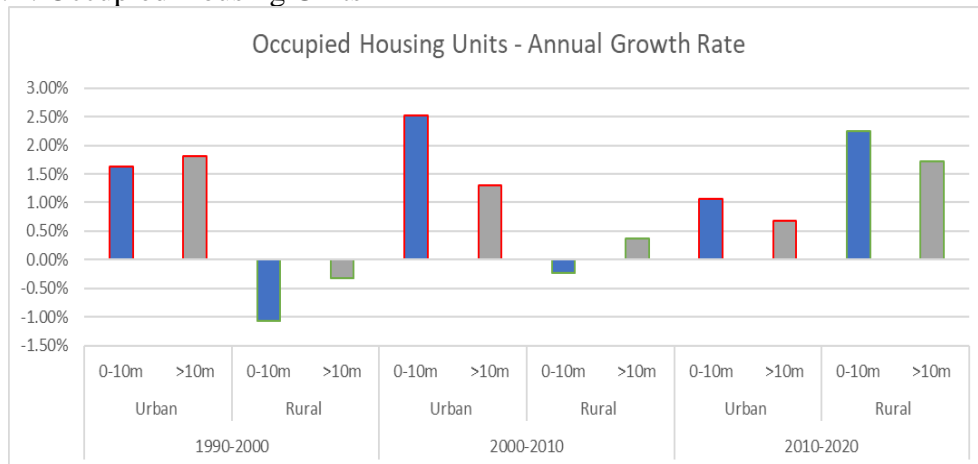

**Figure S3.C. Vacant Housing Units**

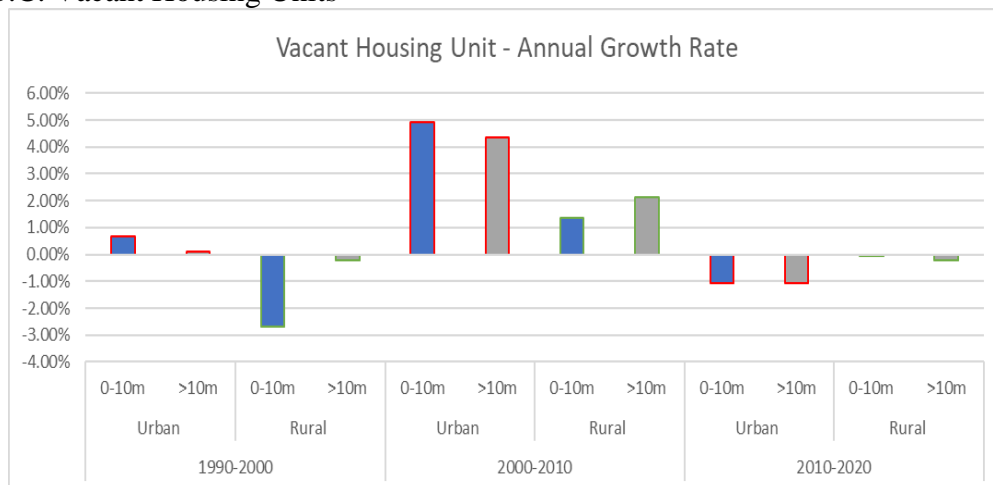

**Figure S4.A-L. Housing Units, 2010, for Florida (A-D), New York (E-H), and Louisiana (I-L), by race and Hispanic origin, and housing tenure, comparisons organized by within vs. outside LECZ by Race and Hispanic Origin, Housing Tenure, and by urban vs. rural classification**

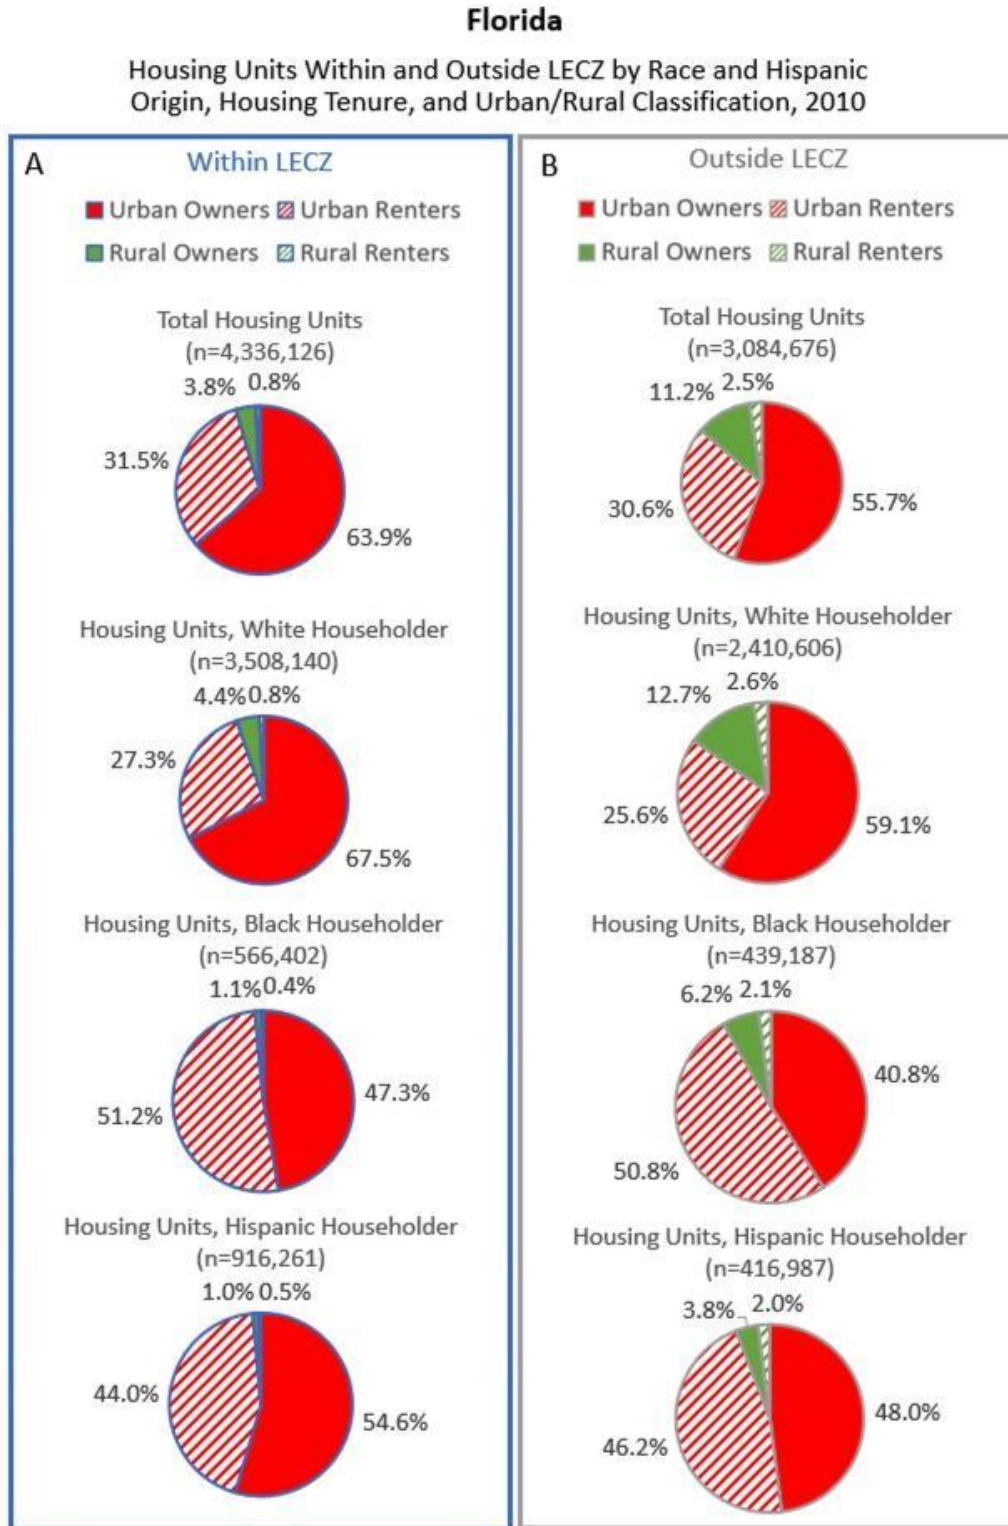

## Florida

Housing Units by Urban/Rural Classification by Race and Hispanic Origin, Housing Tenure, and Within and Outside LECZ, 2010

C

Urban

■ LECZ Owners ■ LECZ Renters  
■ >10m Owners ■ >10m Renters

Total Housing Units  
(n=6,797,351)

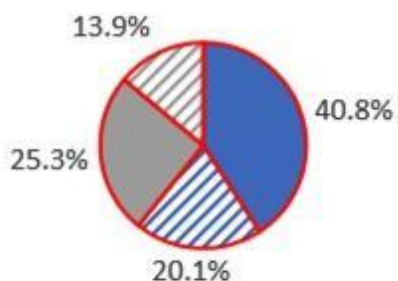

Housing Units, White Householder  
(n=5,366,788)

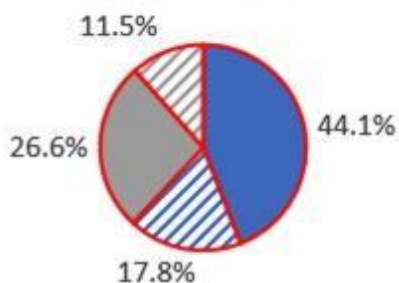

Housing Units, Black Householder  
(n=960,554)

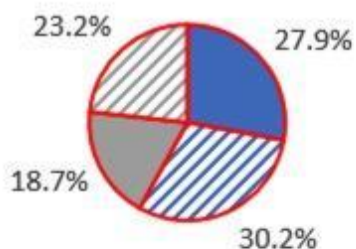

Housing Units, Hispanic Householder  
(n=1,295,847)

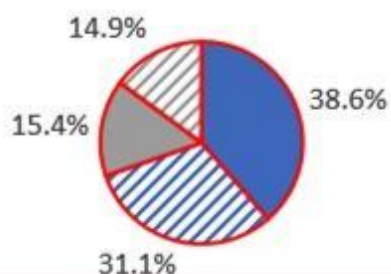

D

Rural

■ LECZ Owners ■ LECZ Renters  
■ >10m Owners ■ >10m Renters

Total Housing Units  
(n=623,451)

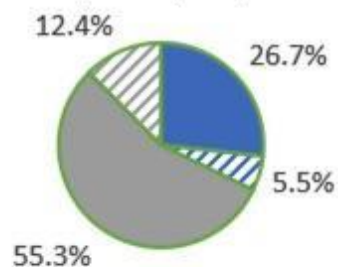

Housing Units, White Householder  
(n=551,958)

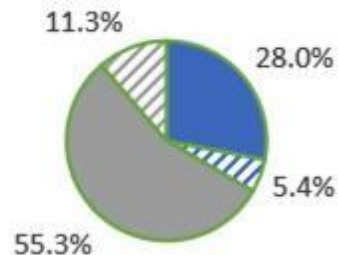

Housing Units, Black Householder  
(n=45,035)

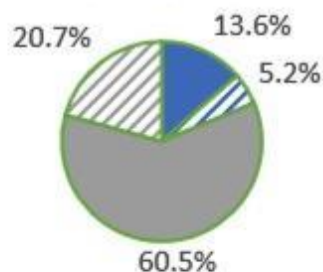

Housing Units, Hispanic Householder  
(n=37,401)

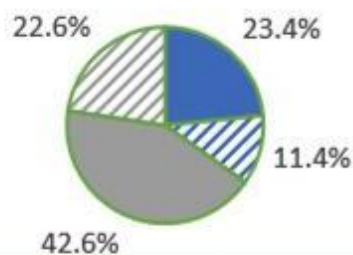



## New York

Housing Units Within and Outside LECZ by Race and Hispanic Origin, Housing Tenure, and Urban/Rural Classification, 2010

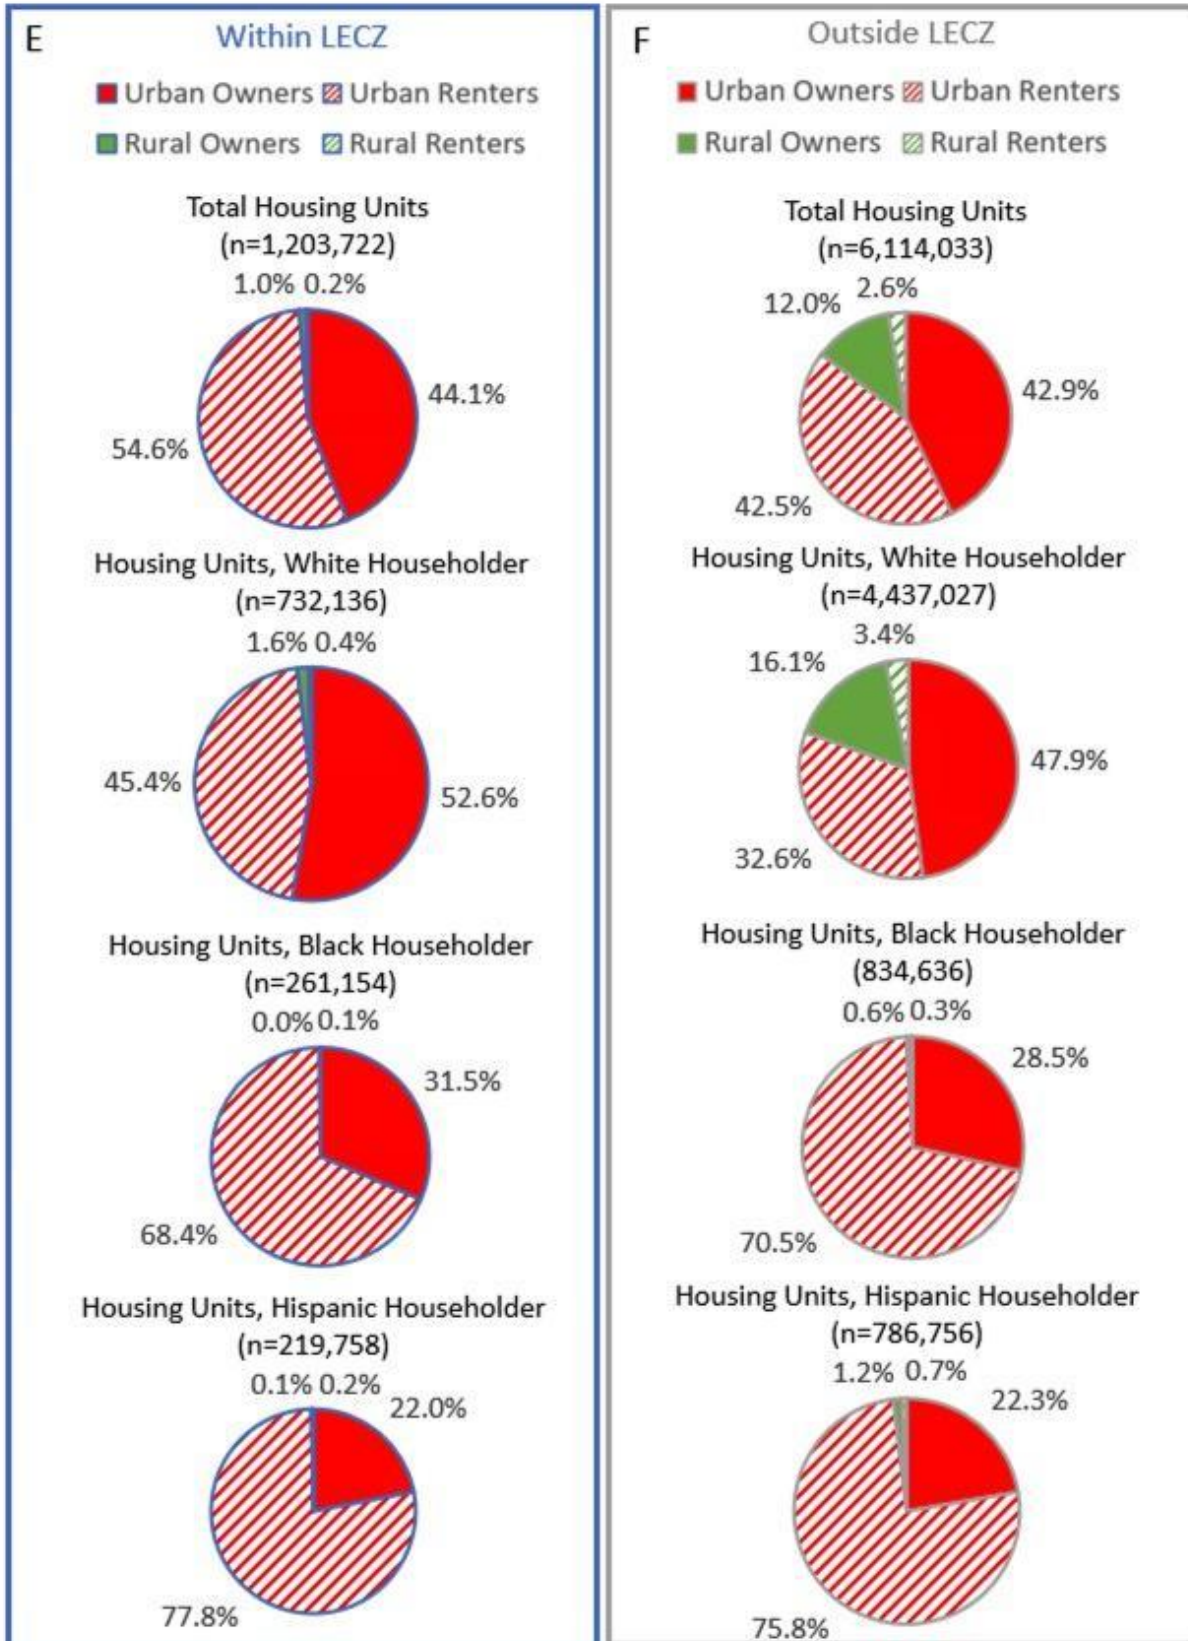

## New York

Housing Units by Urban/Rural Classification by Race and Hispanic Origin, Housing Tenure, and Within and Outside LECZ, 2010

G

Urban

■ LECZ Owners ■ LECZ Renters  
■ >10m Owners ■ >10m Renters

Total Housing Units  
(n=6,407,939)

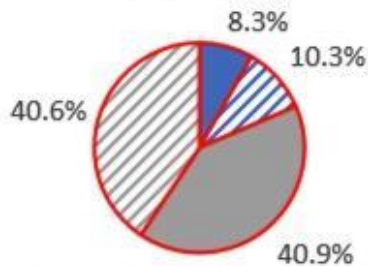

Housing Units, White Householder  
(n=4,289,073)

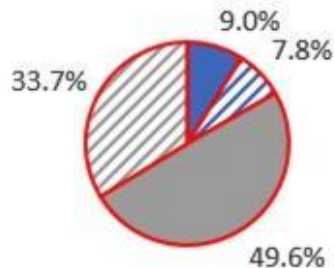

Housing Units, Black Householder  
(n=1,087,629)

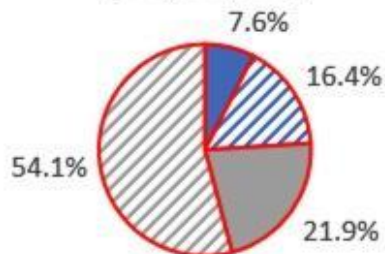

Housing Units, Hispanic Householder  
(n=990,822)

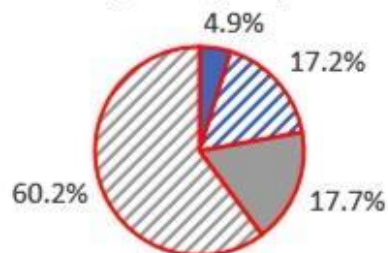

H

Rural

■ LECZ Owners ■ LECZ Renters  
■ >10m Owners ■ >10m Renters

Total Housing Units  
(n=909,816)

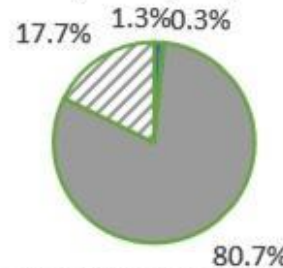

Housing Units, White Householder  
(n=880,090)

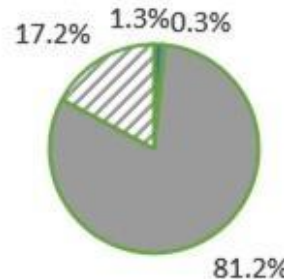

Housing Units, Black Householder  
(n=8,161)

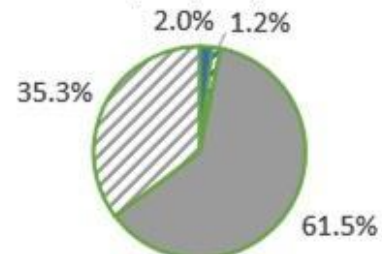

Housing Units, Hispanic Householder  
(n=15,692)

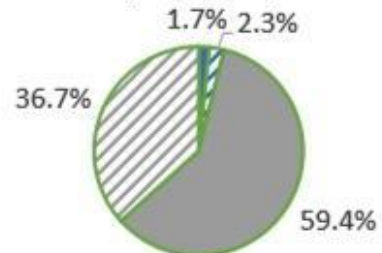

## Louisiana

Housing Units Within and Outside LECZ by Race and Hispanic Origin, Housing Tenure, and Urban/Rural Classification, 2010

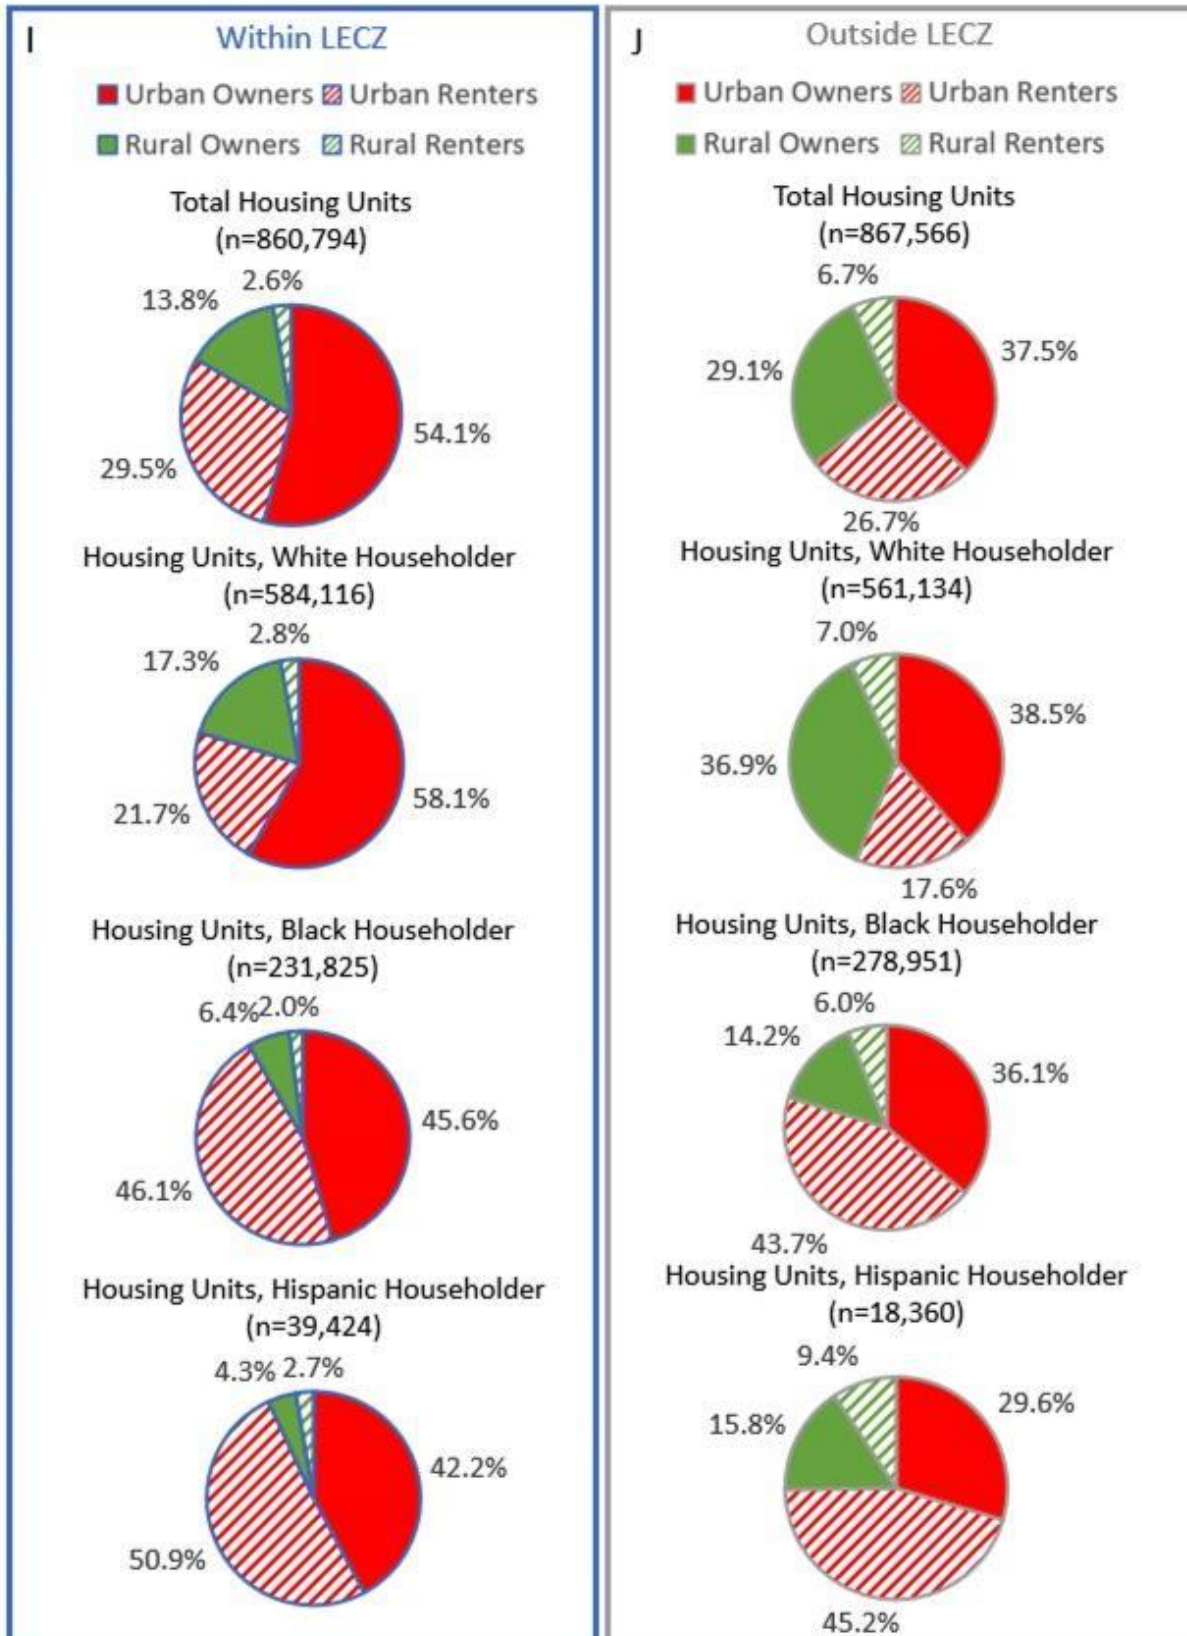



## Louisiana

Housing Units by Urban/Rural Classification by Race and Hispanic Origin, Housing Tenure, and Within and Outside LECZ, 2010

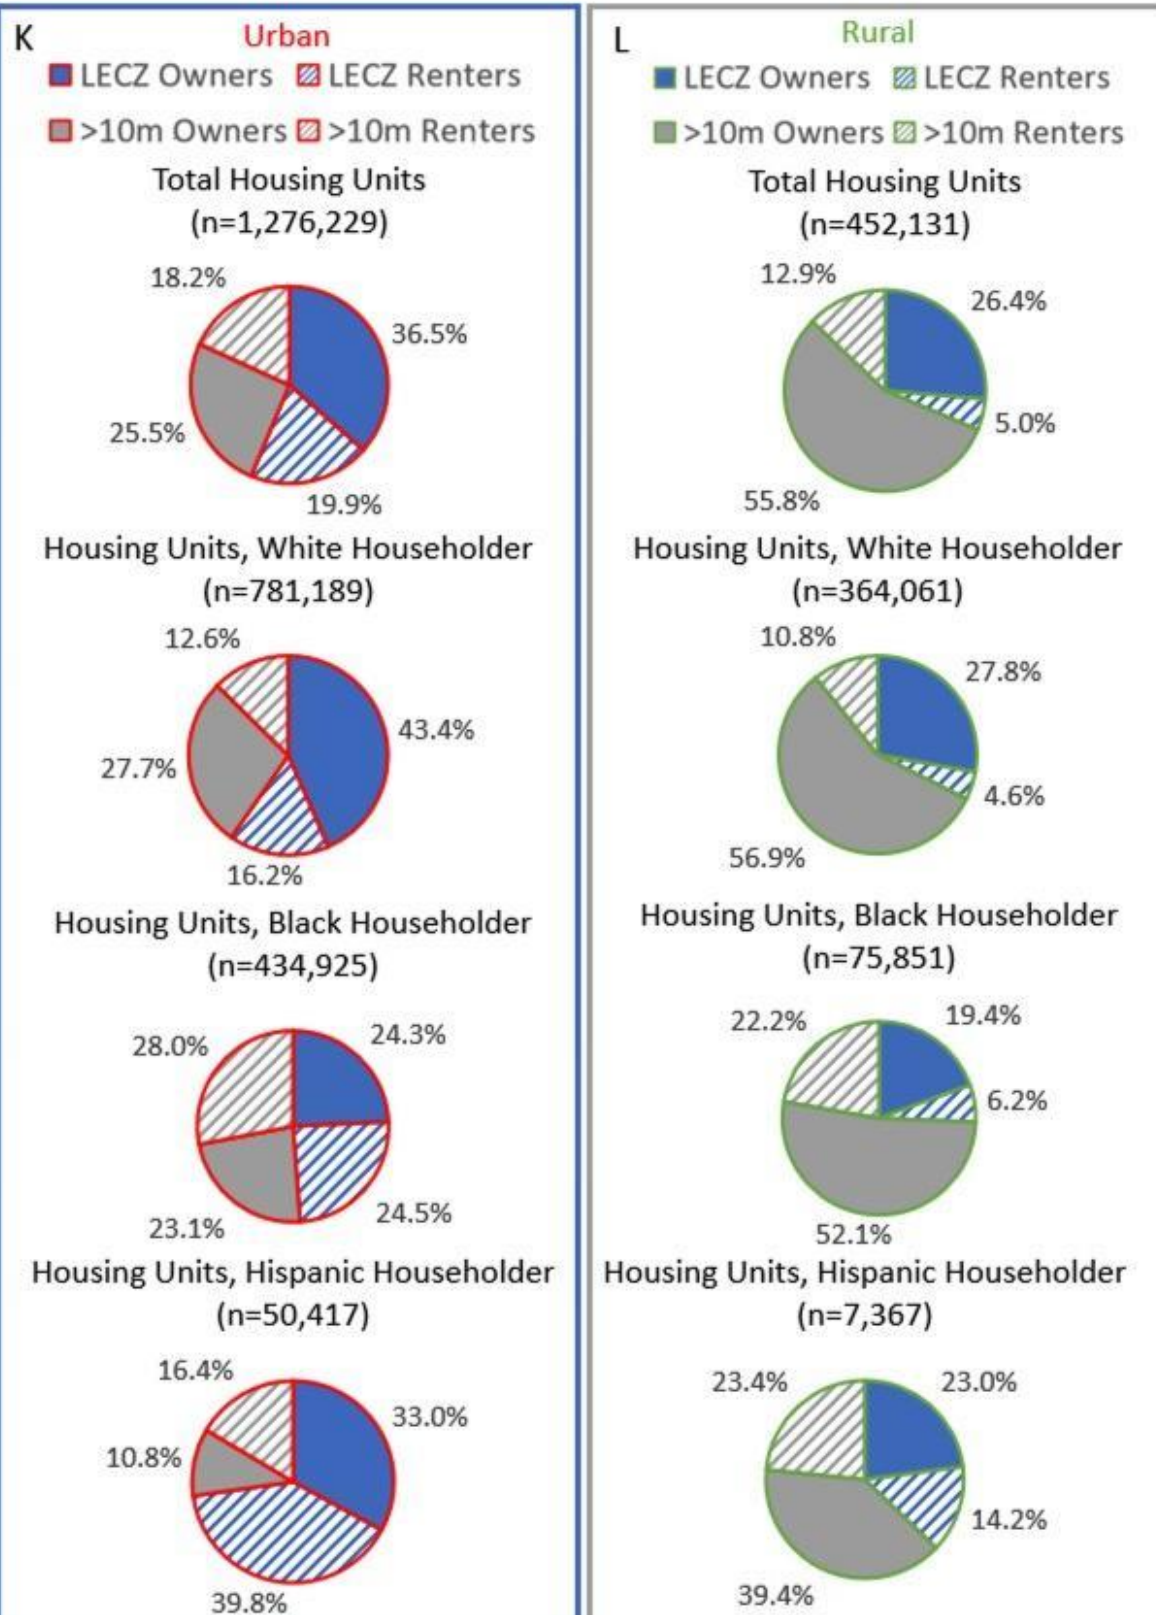

**Figure S5.A-B. Annual Growth Rates (1990-2010) for housing units by housing tenure and race or Hispanic origin of householder for Florida, New York, and Louisiana**

Figure S5.A. Owner Occupied Housing Units

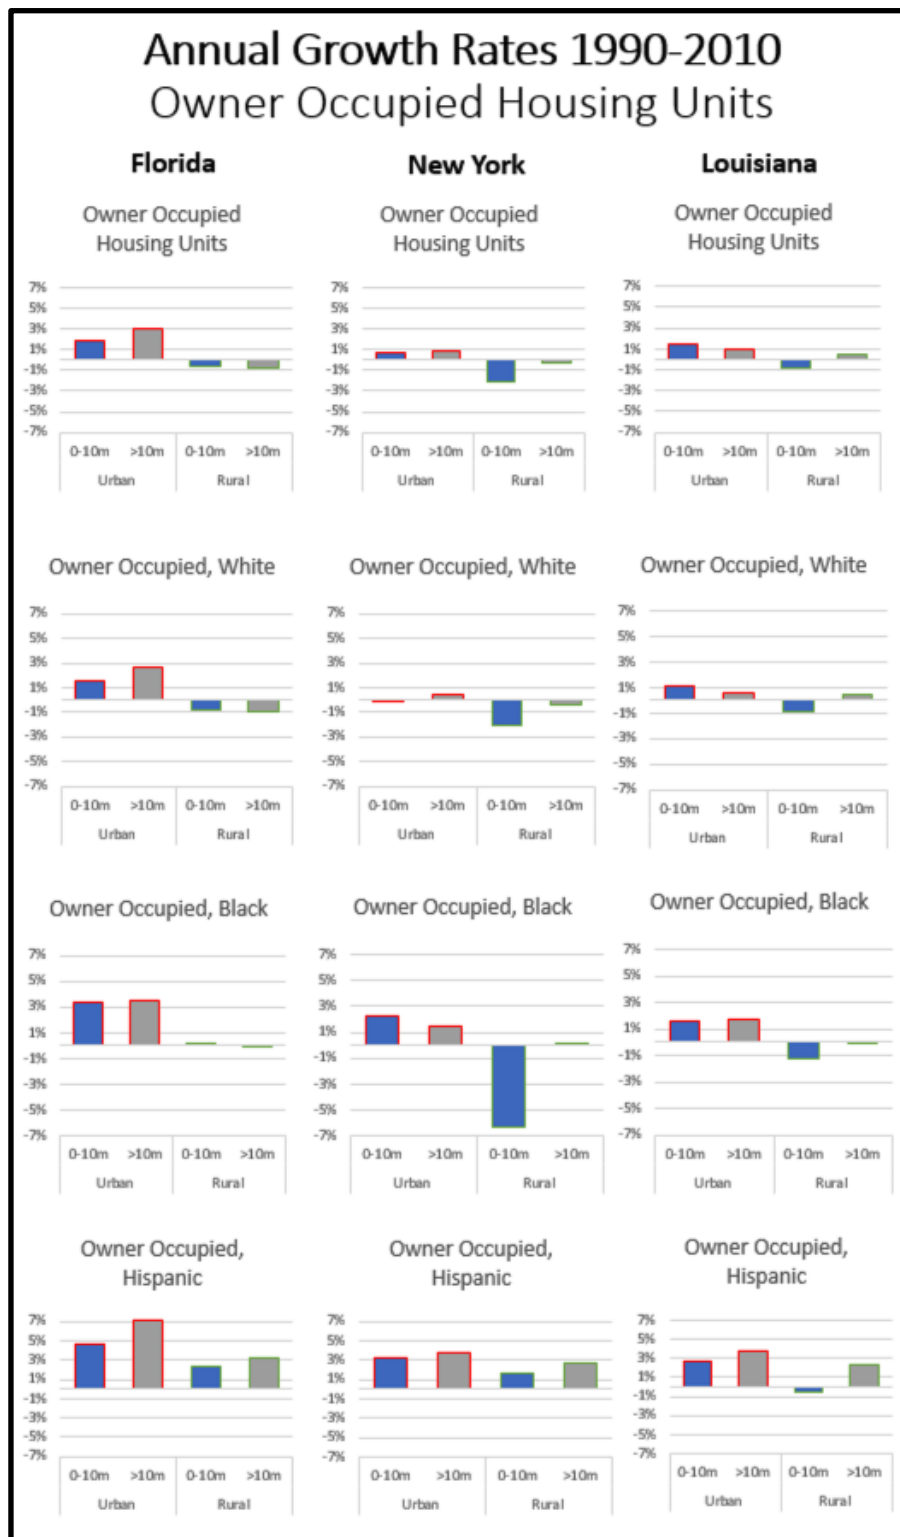

Figure S5.B. Renter Occupied Housing Units

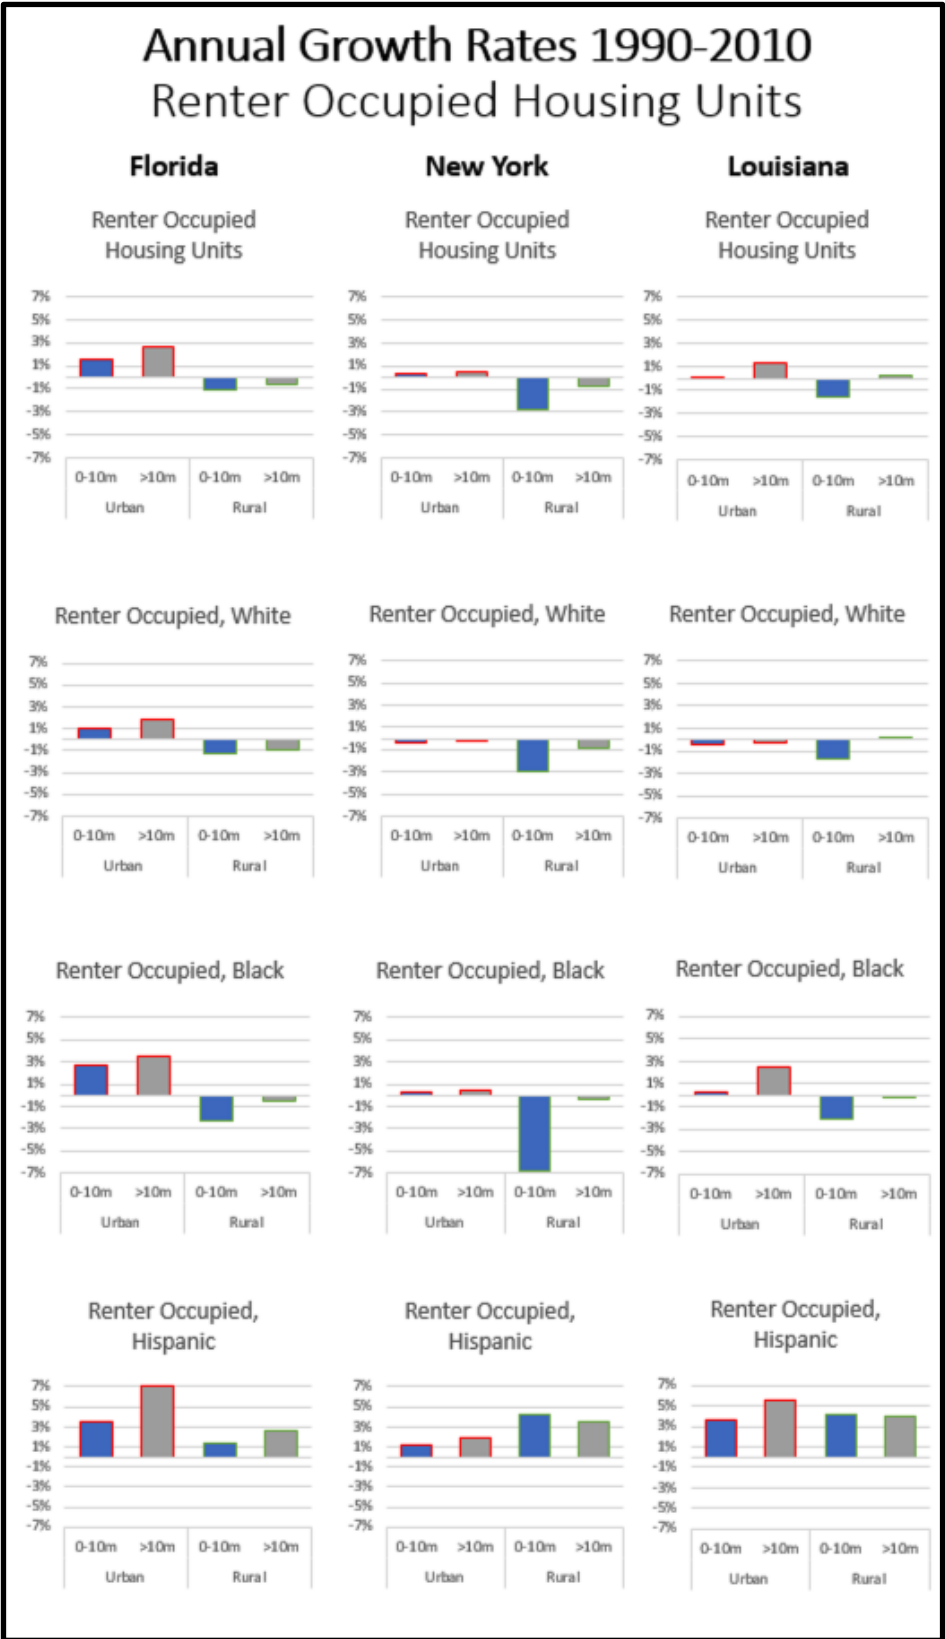

**Figure S6.A-D. Average median age, by urban and rural, in 2000 and 2010 in and outside the LECZ (for all LECZ states, Florida, Louisiana and New York)**

**Figure S6.A. Coastal States**

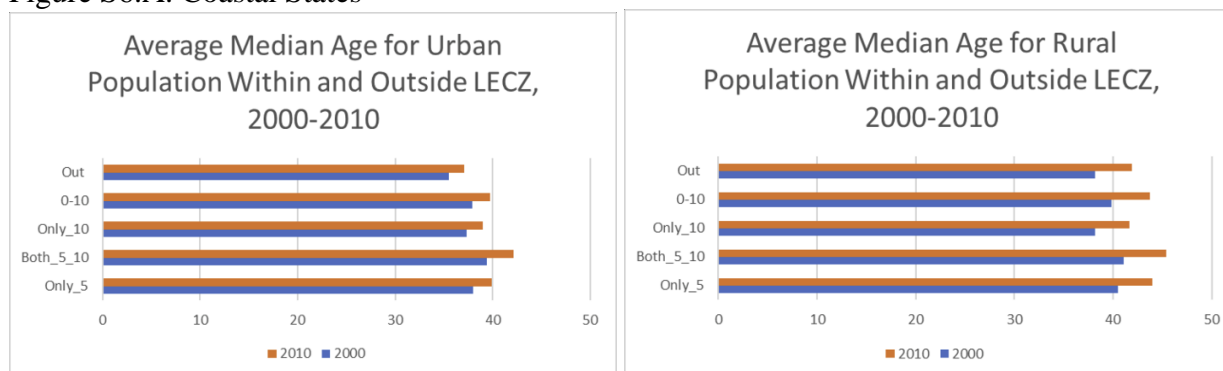

**Figure S6.B. Florida**

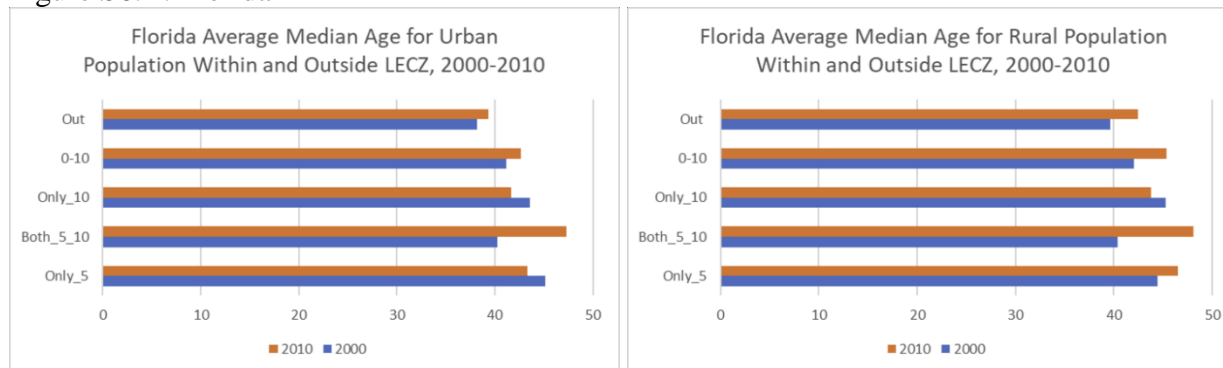

**Figure S6.C. New York**

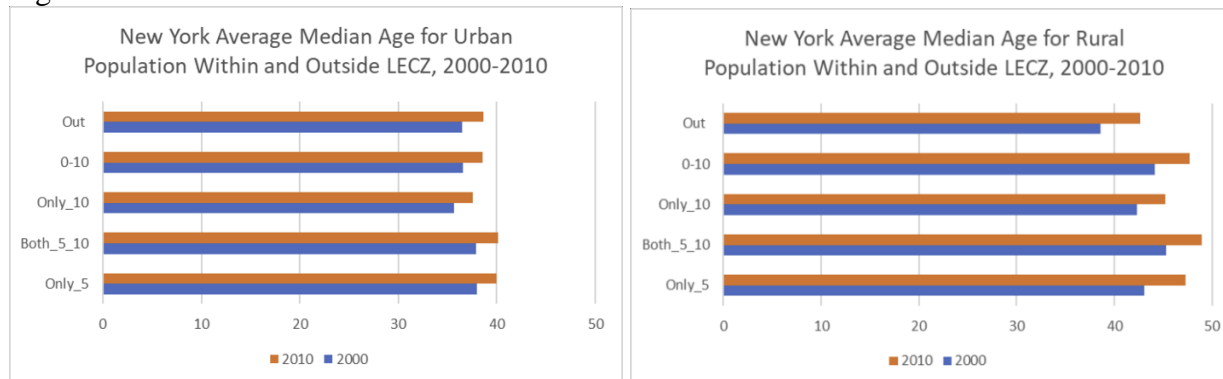

Figure S6.D. Louisiana

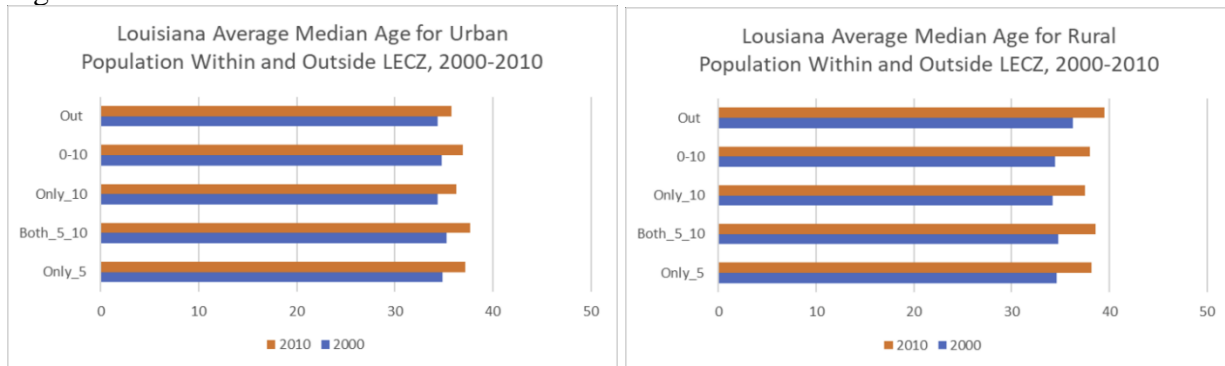

## Tables

**Table S1. Urban and Rural population totals (000s) and percentages in the 0-10m LECZ and outside of all coastal states, 1990 and 2020**

| Population subgroup               | Urban or Rural | 1990   |         |                       |       | 2020   |         |                       |       |
|-----------------------------------|----------------|--------|---------|-----------------------|-------|--------|---------|-----------------------|-------|
|                                   |                | LECZ   |         | In all Coastal States |       | LECZ   |         | In all Coastal States |       |
|                                   |                | 0-10   | >10     | Total                 | (%)   | 0-10   | >10     | Total                 | (%)   |
| Total Population                  | Urban          | 22,146 | 100,797 | 122,943               | 18.0% | 30,593 | 146,110 | 176,703               | 17.3% |
|                                   | Rural          | 3,380  | 30,986  | 34,366                | 9.8%  | 3,409  | 34,417  | 37,826                | 9.0%  |
|                                   | Total          | 25,526 | 131,783 | 157,309               | 16.2% | 34,002 | 180,527 | 214,529               | 15.9% |
| Single Race, White alone          | Urban          | 16,592 | 74,327  | 90,919                | 18.3% | 16,370 | 75,375  | 91,746                | 17.8% |
|                                   | Rural          | 2,867  | 27,087  | 29,954                | 9.6%  | 2,592  | 25,735  | 28,327                | 9.2%  |
|                                   | Total          | 19,459 | 101,413 | 120,872               | 16.1% | 18,962 | 101,111 | 120,073               | 15.8% |
| Single Race, Black alone          | Urban          | 3,861  | 14,870  | 18,731                | 20.6% | 5,115  | 21,535  | 26,649                | 19.2% |
|                                   | Rural          | 425    | 2,984   | 3,409                 | 12.5% | 370    | 3,545   | 3,916                 | 9.5%  |
|                                   | Total          | 4,286  | 17,854  | 22,140                | 19.4% | 5,485  | 25,080  | 30,565                | 18.0% |
| Asian and Pacific Islander, alone | Urban          | 769    | 4,281   | 5,050                 | 15.2% | -      | -       | -                     | -     |
|                                   | Rural          | 23     | 173     | 196                   | 11.7% | -      | -       | -                     | -     |
|                                   | Total          | 792    | 4,454   | 5,246                 | 15.1% | -      | -       | -                     | -     |
| Asian Alone                       | Urban          | -      | -       | -                     | -     | 2,030  | 12,831  | 14,861                | 13.7% |
|                                   | Rural          | -      | -       | -                     | -     | 53     | 713     | 766                   | 6.9%  |
|                                   | Total          | -      | -       | -                     | -     | 2,083  | 13,544  | 15,627                | 13.3% |
| Single Other Race                 | Urban          | 844    | 6,650   | 7,494                 | 11.3% | 2,725  | 17,630  | 20,355                | 13.4% |
|                                   | Rural          | 39     | 522     | 561                   | 7.0%  | 111    | 1,531   | 1,642                 | 6.8%  |
|                                   | Total          | 883    | 7,172   | 8,055                 | 11.0% | 2,836  | 19,161  | 21,997                | 12.9% |
| Two or More Races                 | Urban          | -      | -       | -                     | -     | 4,107  | 17,179  | 21,286                | 19.3% |
|                                   | Rural          | -      | -       | -                     | -     | 251    | 2,535   | 2,786                 | 9.0%  |
|                                   | Total          | -      | -       | -                     | -     | 4,358  | 19,714  | 24,072                | 18.1% |
| Hispanic (any race)               | Urban          | 2,819  | 14,162  | 16,981                | 16.6% | 7,283  | 37,035  | 44,318                | 16.4% |
|                                   | Rural          | 129    | 1,254   | 1,383                 | 9.3%  | 305    | 3,629   | 3,934                 | 7.8%  |
|                                   | Total          | 2,948  | 15,416  | 18,364                | 16.1% | 7,588  | 40,664  | 48,253                | 15.7% |



**Table S2. Urban and Rural population totals (000s) and percentages in the 0-10m LECZ of all coastal states, Florida, New York, Louisiana, 1990-2020**

| State | Urban or Rural | 1990  |        |        |        | 2020   |        |        |        |
|-------|----------------|-------|--------|--------|--------|--------|--------|--------|--------|
|       |                | LECZ  |        | State  |        | LECZ   |        | State  |        |
|       |                | 0-10  | >10    | Total  | %      | 0-10   | >10    | Total  | %      |
| FL    | Urban          | 7,153 | 3,814  | 10,967 | 65.22% | 11,495 | 7,803  | 19,297 | 59.57% |
|       | Rural          | 630   | 1,340  | 1,971  | 31.99% | 755    | 1,486  | 2,240  | 33.69% |
|       | Total          | 7,783 | 5,154  | 12,938 | 60.16% | 12,249 | 9,288  | 21,538 | 56.87% |
| NY    | Urban          | 2,935 | 12,230 | 15,164 | 19.35% | 3,515  | 14,394 | 17,910 | 19.63% |
|       | Rural          | 62    | 2,764  | 2,826  | 2.20%  | 43     | 2,248  | 2,291  | 1.89%  |
|       | Total          | 2,997 | 14,994 | 17,990 | 16.66% | 3,559  | 16,642 | 20,201 | 17.62% |
| LA    | Urban          | 1,640 | 1,231  | 2,872  | 57.12% | 2,007  | 1,416  | 3,423  | 58.63% |
|       | Rural          | 517   | 831    | 1,348  | 38.34% | 414    | 821    | 1,234  | 33.52% |
|       | Total          | 2,157 | 2,063  | 4,220  | 51.12% | 2,421  | 2,237  | 4,658  | 51.98% |

**Table S3. Total housing units within and outside the LECZ by urban/rural classification, 1990-2020**

| Total Housing Units |                     |      |            |
|---------------------|---------------------|------|------------|
| 1990                | Urban               | 0-10 | 9,709,593  |
|                     |                     | >10  | 40,119,040 |
|                     | Rural               | 0-10 | 1,700,958  |
|                     |                     | >10  | 12,762,375 |
|                     | Total Housing Units |      |            |
| 2020                | Urban               | 0-10 | 13,944,864 |
|                     |                     | >10  | 58,401,862 |
|                     | Rural               | 0-10 | 1,765,311  |
|                     |                     | >10  | 15,226,351 |
|                     | Total Housing Units |      |            |

**Table S4. Average median age, by urban and rural, in 2000 and 2010 in and outside the LECZ (for all LECZ states, Florida, Louisiana and New York)**

|                       |              | Coastal States |       |      |          | Florida |       |       |          | Louisiana |       |      |          | New York |       |      |          |
|-----------------------|--------------|----------------|-------|------|----------|---------|-------|-------|----------|-----------|-------|------|----------|----------|-------|------|----------|
|                       |              | 2000           | 2010  | Δ    | % change | 2000    | 2010  | Δ     | % change | 2000      | 2010  | Δ    | % change | 2000     | 2010  | Δ    | % change |
| Total                 |              | 36.35          | 38.27 | 1.92 | 5.27     | 40.12   | 41.50 | 1.39  | 3.45     | 34.89     | 37.14 | 2.25 | 6.45     | 36.51    | 38.65 | 2.14 | 5.86     |
| Urban                 |              | 35.93          | 37.55 | 1.61 | 4.49     | 40.08   | 41.32 | 1.24  | 3.10     | 34.60     | 36.45 | 1.85 | 5.35     | 36.20    | 38.08 | 1.88 | 5.19     |
| Rural                 |              | 38.31          | 42.04 | 3.73 | 9.74     | 40.43   | 43.36 | 2.93  | 7.25     | 35.65     | 39.02 | 3.37 | 9.44     | 38.66    | 42.77 | 4.11 | 10.63    |
| L<br>E<br>C<br>Z      | 0-10m (in)   | 38.09          | 40.11 | 2.02 | 5.30     | 41.25   | 42.75 | 1.50  | 3.63     | 34.73     | 37.14 | 2.42 | 6.96     | 36.60    | 38.57 | 1.97 | 5.39     |
|                       | 0-5m only    | 38.20          | 40.21 | 2.02 | 5.28     | 43.66   | 43.42 | -0.24 | -0.55    | 34.84     | 37.32 | 2.48 | 7.13     | 37.99    | 39.99 | 2.00 | 5.27     |
|                       | 0-5m & 0-10m | 39.76          | 42.72 | 2.96 | 7.45     | 45.03   | 47.38 | 2.36  | 5.23     | 35.09     | 37.98 | 2.89 | 8.24     | 37.86    | 40.16 | 2.30 | 6.07     |
|                       | 5-10m only   | 37.41          | 39.13 | 1.73 | 4.61     | 40.23   | 41.72 | 1.49  | 3.71     | 34.36     | 36.56 | 2.20 | 6.41     | 35.68    | 37.54 | 1.86 | 5.21     |
|                       | >10 m (out)  | 36.02          | 37.93 | 1.91 | 5.30     | 38.43   | 39.80 | 1.37  | 3.56     | 35.06     | 37.14 | 2.08 | 5.92     | 36.49    | 38.66 | 2.17 | 5.96     |
| U<br>r<br>b<br>a<br>n | 0-10m        | 37.90          | 39.76 | 1.86 | 4.91     | 41.20   | 42.62 | 1.42  | 3.44     | 34.78     | 36.96 | 2.18 | 6.26     | 36.50    | 38.46 | 1.96 | 5.38     |
|                       | 0-5m only    | 37.96          | 39.86 | 1.90 | 5.00     | 45.10   | 43.28 | -1.82 | -4.03    | 34.86     | 37.23 | 2.37 | 6.80     | 37.94    | 39.93 | 1.99 | 5.25     |
|                       | 0-5m & 0-10m | 39.44          | 42.13 | 2.69 | 6.83     | 40.22   | 47.31 | 7.08  | 17.61    | 35.32     | 37.68 | 2.35 | 6.66     | 37.63    | 39.89 | 2.26 | 6.01     |
|                       | 5-10m only   | 37.35          | 38.97 | 1.62 | 4.34     | 43.54   | 41.64 | -1.90 | -4.37    | 34.40     | 36.30 | 1.90 | 5.54     | 35.64    | 37.50 | 1.86 | 5.23     |
|                       | >10 m        | 35.52          | 37.10 | 1.58 | 4.45     | 38.17   | 39.36 | 1.19  | 3.11     | 34.35     | 35.79 | 1.44 | 4.19     | 36.13    | 37.99 | 1.86 | 5.15     |
| R<br>u<br>r<br>a<br>l | 0-10m        | 39.81          | 43.70 | 3.88 | 9.75     | 42.07   | 45.39 | 3.32  | 7.88     | 34.48     | 38.01 | 3.53 | 10.24    | 44.11    | 47.73 | 3.62 | 8.20     |
|                       | 0-5m only    | 40.51          | 44.00 | 3.49 | 8.61     | 44.45   | 46.50 | 2.04  | 4.60     | 34.57     | 38.13 | 3.56 | 10.31    | 43.03    | 47.32 | 4.29 | 9.98     |
|                       | 0-5m & 0-10m | 41.10          | 45.42 | 4.32 | 10.52    | 40.38   | 48.11 | 7.73  | 19.14    | 34.74     | 38.56 | 3.82 | 10.99    | 45.29    | 48.94 | 3.65 | 8.06     |
|                       | 5-10m only   | 38.17          | 41.68 | 3.51 | 9.20     | 45.30   | 43.81 | -1.49 | -3.29    | 34.23     | 37.55 | 3.32 | 9.69     | 42.30    | 45.21 | 2.91 | 6.87     |
|                       | >10 m        | 38.15          | 41.88 | 3.73 | 9.76     | 39.64   | 42.44 | 2.81  | 7.08     | 36.28     | 39.50 | 3.21 | 8.85     | 38.56    | 42.69 | 4.13 | 10.71    |

Note: Yellow highlight represents a difference in the median age from 2000 to 2010 that is higher than the difference for the total region, whether the coastal states, Florida, Louisiana, or New York.

**Table S5.A-C. Distribution of housing units by race and Hispanic origin of householder, 2010**

Table S5.A. Distribution of housing units by race and Hispanic origin of householder by housing tenure, within and outside the LECZ by urban/rural classification for coastal states, 2010

| Housing Tenure                | Race/Hispanic Origin | 2010   |        |        |        |
|-------------------------------|----------------------|--------|--------|--------|--------|
|                               |                      | Urban  |        | Rural  |        |
|                               |                      | 0-10 M | > 10 M | 0-10 M | > 10 M |
| Owner Occupied Housing Units  | Total                | 8.93%  | 40.98% | 1.19%  | 12.11% |
|                               | White                | 9.85%  | 43.41% | 1.42%  | 14.69% |
|                               | Black                | 7.10%  | 30.93% | 0.81%  | 6.64%  |
|                               | Hispanic             | 7.68%  | 34.99% | 0.26%  | 3.10%  |
| Renter Occupied Housing Units | Total                | 5.81%  | 27.86% | 0.27%  | 2.84%  |
|                               | White                | 4.87%  | 22.37% | 0.29%  | 3.09%  |
|                               | Black                | 9.56%  | 42.10% | 0.29%  | 2.56%  |
|                               | Hispanic             | 8.93%  | 43.11% | 0.16%  | 1.78%  |

Note: The denominator for each cell above is the total housing units for the householders of that particular race, for example 9.85% of all housing units with a White householder (the sum of all housing units: urban, rural, owner-occupied, and renter-occupied) were urban owner-occupied housing units in the LECZ.

Table S5.B. Distribution of housing units by race and Hispanic origin of householders by housing tenure in the LECZ for coastal states, 2010

| Housing Tenure                          | Race/Hispanic Origin | 0-10  | >10   | TOTAL  |
|-----------------------------------------|----------------------|-------|-------|--------|
| Owner Occupied Housing Units            | Total                | 10.1% | 53.1% | 63.2%  |
|                                         | White                | 11.3% | 58.1% | 69.4%  |
|                                         | Black                | 7.9%  | 37.6% | 45.5%  |
|                                         | Hispanic             | 7.9%  | 38.1% | 46.0%  |
| Renter Occupied Housing Units           | Total                | 6.1%  | 30.7% | 36.8%  |
|                                         | White                | 5.2%  | 25.5% | 30.6%  |
|                                         | Black                | 9.9%  | 44.7% | 54.5%  |
|                                         | Hispanic             | 9.1%  | 44.9% | 54.0%  |
| Owner and Renter Occupied Housing Units | Total                | 16.2% | 83.8% | 100.0% |
|                                         | White                | 16.4% | 83.6% | 100.0% |
|                                         | Black                | 17.8% | 82.2% | 100.0% |
|                                         | Hispanic             | 17.0% | 83.0% | 100.0% |

Note: This table is similar to S5.A. but is not disaggregated by urban/rural classification.

Table S5.C. Distribution of housing units in the LECZ by race and Hispanic origin of householders, housing tenure, and urban/rural classification for coastal states, 2010

|          | Urban          |                 | Rural          |                 |
|----------|----------------|-----------------|----------------|-----------------|
|          | Owner Occupied | Renter Occupied | Owner Occupied | Renter Occupied |
| Total    | 17.90%         | 17.26%          | 8.95%          | 8.81%           |
| White    | 18.49%         | 17.88%          | 8.80%          | 8.61%           |
| Black    | 18.67%         | 18.51%          | 10.90%         | 10.08%          |
| Hispanic | 17.99%         | 17.16%          | 7.64%          | 8.46%           |

Note: Instead of looking at the shares of the total housing units for the householders of a particular race or Hispanic origin, the table above shows the share of the total housing units by housing tenure and race/Hispanic origin of householders that are located in the LECZ. For example, 18.49% of the total urban owner-occupied housing units with White householders live in the LECZ.
